# Supplementary material for: Diffusion in confinement: kinetic simulations of self- and collective diffusion behavior of adsorbed gases
Source: Royal Society of Chemistry journal article supplement (doi:10.1039/c2cp41147d), 2012-01-01
Supplement: c2cp41147d.block [file c2cp41147d.block]

8
0.0 0.0 0.0  2.94660
0.0 0.0 0.5  2.94660
0.0 0.5 0.0  2.94660
0.0 0.5 0.5  2.94660
0.5 0.0 0.0  2.94660
0.5 0.0 0.5  2.94660
0.5 0.5 0.0  2.94660
0.5 0.5 0.5  2.94660
