# Supplementary material for: Diffusion in confinement: kinetic simulations of self- and collective diffusion behavior of adsorbed gases
Source: Royal Society of Chemistry journal article supplement (doi:10.1039/c2cp41147d), 2012-01-01
Supplement: c2cp41147d.cssr [file c2cp41147d.cssr]

                                  13.827  13.827  8.58
                   90.0  90.0  120.0  SPGR =  1 P 1         OPT = 1
72   0
0 AFI       : AFI
  1 O  0.4565  0.3333  0.0  0  0  0  0  0  0  0  0  0.00
  2 O  0.1232  0.4565  0.0  0  0  0  0  0  0  0  0  0.00
  3 O  0.3333  0.8768  0.0  0  0  0  0  0  0  0  0  0.00
  4 O  0.6667  0.1232  0.0  0  0  0  0  0  0  0  0  0.00
  5 O  0.8768  0.5435  0.0  0  0  0  0  0  0  0  0  0.00
  6 O  0.1232  0.6667  0.5  0  0  0  0  0  0  0  0  0.00
  7 O  0.5435  0.8768  0.5  0  0  0  0  0  0  0  0  0.00
  8 O  0.5435  0.6667  0.0  0  0  0  0  0  0  0  0  0.00
  9 O  0.3333  0.4565  0.5  0  0  0  0  0  0  0  0  0.00
  10 O  0.6667  0.5435  0.5  0  0  0  0  0  0  0  0  0.00
  11 O  0.8768  0.3333  0.5  0  0  0  0  0  0  0  0  0.00
  12 O  0.4565  0.1232  0.5  0  0  0  0  0  0  0  0  0.00
  13 O  0.3693  0.3693  0.25  0  0  0  0  0  0  0  0  0.00
  14 O  0.0  0.3693  0.25  0  0  0  0  0  0  0  0  0.00
  15 O  0.3693  0.0  0.25  0  0  0  0  0  0  0  0  0.00
  16 O  0.6307  0.0  0.25  0  0  0  0  0  0  0  0  0.00
  17 O  0.0  0.6307  0.25  0  0  0  0  0  0  0  0  0.00
  18 O  0.6307  0.6307  0.25  0  0  0  0  0  0  0  0  0.00
  19 O  0.6307  0.6307  0.75  0  0  0  0  0  0  0  0  0.00
  20 O  0.0  0.6307  0.75  0  0  0  0  0  0  0  0  0.00
  21 O  0.6307  0.0  0.75  0  0  0  0  0  0  0  0  0.00
  22 O  0.3693  0.0  0.75  0  0  0  0  0  0  0  0  0.00
  23 O  0.0  0.3693  0.75  0  0  0  0  0  0  0  0  0.00
  24 O  0.3693  0.3693  0.75  0  0  0  0  0  0  0  0  0.00
  25 O  0.42  0.21  0.25  0  0  0  0  0  0  0  0  0.00
  26 O  0.21  0.42  0.25  0  0  0  0  0  0  0  0  0.00
  27 O  0.21  0.79  0.25  0  0  0  0  0  0  0  0  0.00
  28 O  0.79  0.21  0.25  0  0  0  0  0  0  0  0  0.00
  29 O  0.79  0.58  0.25  0  0  0  0  0  0  0  0  0.00
  30 O  0.58  0.79  0.25  0  0  0  0  0  0  0  0  0.00
  31 O  0.58  0.79  0.75  0  0  0  0  0  0  0  0  0.00
  32 O  0.79  0.58  0.75  0  0  0  0  0  0  0  0  0.00
  33 O  0.79  0.21  0.75  0  0  0  0  0  0  0  0  0.00
  34 O  0.21  0.79  0.75  0  0  0  0  0  0  0  0  0.00
  35 O  0.21  0.42  0.75  0  0  0  0  0  0  0  0  0.00
  36 O  0.42  0.21  0.75  0  0  0  0  0  0  0  0  0.00
  37 O  0.5798  0.4202  0.25  0  0  0  0  0  0  0  0  0.00
  38 O  0.1596  0.5798  0.25  0  0  0  0  0  0  0  0  0.00
  39 O  0.4202  0.8404  0.25  0  0  0  0  0  0  0  0  0.00
  40 O  0.5798  0.1596  0.25  0  0  0  0  0  0  0  0  0.00
  41 O  0.8404  0.4202  0.25  0  0  0  0  0  0  0  0  0.00
  42 O  0.4202  0.5798  0.25  0  0  0  0  0  0  0  0  0.00
  43 O  0.4202  0.5798  0.75  0  0  0  0  0  0  0  0  0.00
  44 O  0.8404  0.4202  0.75  0  0  0  0  0  0  0  0  0.00
  45 O  0.5798  0.1596  0.75  0  0  0  0  0  0  0  0  0.00
  46 O  0.4202  0.8404  0.75  0  0  0  0  0  0  0  0  0.00
  47 O  0.1596  0.5798  0.75  0  0  0  0  0  0  0  0  0.00
  48 O  0.5798  0.4202  0.75  0  0  0  0  0  0  0  0  0.00
  49 Si  0.4565  0.3334  0.1874  0  0  0  0  0  0  0  0  0.00
  50 Si  0.1231  0.4565  0.1874  0  0  0  0  0  0  0  0  0.00
  51 Si  0.3334  0.8769  0.1874  0  0  0  0  0  0  0  0  0.00
  52 Si  0.6666  0.1231  0.1874  0  0  0  0  0  0  0  0  0.00
  53 Si  0.8769  0.5435  0.1874  0  0  0  0  0  0  0  0  0.00
  54 Si  0.1231  0.6666  0.3126  0  0  0  0  0  0  0  0  0.00
  55 Si  0.5435  0.8769  0.3126  0  0  0  0  0  0  0  0  0.00
  56 Si  0.5435  0.6666  0.1874  0  0  0  0  0  0  0  0  0.00
  57 Si  0.3334  0.4565  0.3126  0  0  0  0  0  0  0  0  0.00
  58 Si  0.6666  0.5435  0.3126  0  0  0  0  0  0  0  0  0.00
  59 Si  0.8769  0.3334  0.3126  0  0  0  0  0  0  0  0  0.00
  60 Si  0.4565  0.1231  0.3126  0  0  0  0  0  0  0  0  0.00
  61 Si  0.5435  0.6666  0.8126  0  0  0  0  0  0  0  0  0.00
  62 Si  0.8769  0.5435  0.8126  0  0  0  0  0  0  0  0  0.00
  63 Si  0.6666  0.1231  0.8126  0  0  0  0  0  0  0  0  0.00
  64 Si  0.3334  0.8769  0.8126  0  0  0  0  0  0  0  0  0.00
  65 Si  0.1231  0.4565  0.8126  0  0  0  0  0  0  0  0  0.00
  66 Si  0.8769  0.3334  0.6874  0  0  0  0  0  0  0  0  0.00
  67 Si  0.4565  0.1231  0.6874  0  0  0  0  0  0  0  0  0.00
  68 Si  0.4565  0.3334  0.8126  0  0  0  0  0  0  0  0  0.00
  69 Si  0.6666  0.5435  0.6874  0  0  0  0  0  0  0  0  0.00
  70 Si  0.3334  0.4565  0.6874  0  0  0  0  0  0  0  0  0.00
  71 Si  0.1231  0.6666  0.6874  0  0  0  0  0  0  0  0  0.00
  72 Si  0.5435  0.8769  0.6874  0  0  0  0  0  0  0  0  0.00
