# Supplementary material for: Diffusion in confinement: kinetic simulations of self- and collective diffusion behavior of adsorbed gases
Source: Royal Society of Chemistry journal article supplement (doi:10.1039/c2cp41147d), 2012-01-01
Supplement: c2cp41147d_2.cssr [file c2cp41147d_2.cssr]

                                       24.5550 24.5550 24.5550
                       90.000  90.000  90.000    SPGR =  1 P 1         OPT = 1
 576   0 Created by Raspa-1.0
     0 LTA_SI         : LTA_SI
   1 Si      0.00000   0.09316   0.18499    0   0   0   0   0   0   0   0   0.000
   2 Si      0.00000   0.18715   0.09042    0   0   0   0   0   0   0   0   0.000
   3 O       0.00000   0.11367   0.24663    0   0   0   0   0   0   0   0   0.000
   4 O       0.00000   0.14459   0.14591    0   0   0   0   0   0   0   0   0.000
   5 O       0.05379   0.05865   0.17152    0   0   0   0   0   0   0   0   0.000
   6 Si      0.00000   0.90684   0.18499    0   0   0   0   0   0   0   0   0.000
   7 Si      0.00000   0.81285   0.09042    0   0   0   0   0   0   0   0   0.000
   8 O       0.00000   0.88633   0.24663    0   0   0   0   0   0   0   0   0.000
   9 O       0.00000   0.85541   0.14591    0   0   0   0   0   0   0   0   0.000
  10 O       0.94621   0.94135   0.17152    0   0   0   0   0   0   0   0   0.000
  11 Si      0.00000   0.09316   0.81501    0   0   0   0   0   0   0   0   0.000
  12 Si      0.00000   0.18715   0.90958    0   0   0   0   0   0   0   0   0.000
  13 O       0.00000   0.11367   0.75337    0   0   0   0   0   0   0   0   0.000
  14 O       0.00000   0.14459   0.85409    0   0   0   0   0   0   0   0   0.000
  15 O       0.94621   0.05865   0.82848    0   0   0   0   0   0   0   0   0.000
  16 Si      0.00000   0.90684   0.81501    0   0   0   0   0   0   0   0   0.000
  17 Si      0.00000   0.81285   0.90958    0   0   0   0   0   0   0   0   0.000
  18 O       0.00000   0.88633   0.75337    0   0   0   0   0   0   0   0   0.000
  19 O       0.00000   0.85541   0.85409    0   0   0   0   0   0   0   0   0.000
  20 O       0.05379   0.94135   0.82848    0   0   0   0   0   0   0   0   0.000
  21 Si      0.18499   0.00000   0.09316    0   0   0   0   0   0   0   0   0.000
  22 Si      0.09042   0.00000   0.18715    0   0   0   0   0   0   0   0   0.000
  23 O       0.24663   0.00000   0.11367    0   0   0   0   0   0   0   0   0.000
  24 O       0.14591   0.00000   0.14459    0   0   0   0   0   0   0   0   0.000
  25 O       0.17152   0.05379   0.05865    0   0   0   0   0   0   0   0   0.000
  26 Si      0.18499   0.00000   0.90684    0   0   0   0   0   0   0   0   0.000
  27 Si      0.09042   0.00000   0.81285    0   0   0   0   0   0   0   0   0.000
  28 O       0.24663   0.00000   0.88633    0   0   0   0   0   0   0   0   0.000
  29 O       0.14591   0.00000   0.85541    0   0   0   0   0   0   0   0   0.000
  30 O       0.17152   0.94621   0.94135    0   0   0   0   0   0   0   0   0.000
  31 Si      0.81501   0.00000   0.09316    0   0   0   0   0   0   0   0   0.000
  32 Si      0.90958   0.00000   0.18715    0   0   0   0   0   0   0   0   0.000
  33 O       0.75337   0.00000   0.11367    0   0   0   0   0   0   0   0   0.000
  34 O       0.85409   0.00000   0.14459    0   0   0   0   0   0   0   0   0.000
  35 O       0.82848   0.94621   0.05865    0   0   0   0   0   0   0   0   0.000
  36 Si      0.81501   0.00000   0.90684    0   0   0   0   0   0   0   0   0.000
  37 Si      0.90958   0.00000   0.81285    0   0   0   0   0   0   0   0   0.000
  38 O       0.75337   0.00000   0.88633    0   0   0   0   0   0   0   0   0.000
  39 O       0.85409   0.00000   0.85541    0   0   0   0   0   0   0   0   0.000
  40 O       0.82848   0.05379   0.94135    0   0   0   0   0   0   0   0   0.000
  41 Si      0.09316   0.18499   0.00000    0   0   0   0   0   0   0   0   0.000
  42 Si      0.18715   0.09042   0.00000    0   0   0   0   0   0   0   0   0.000
  43 O       0.11367   0.24663   0.00000    0   0   0   0   0   0   0   0   0.000
  44 O       0.14459   0.14591   0.00000    0   0   0   0   0   0   0   0   0.000
  45 O       0.05865   0.17152   0.05379    0   0   0   0   0   0   0   0   0.000
  46 Si      0.90684   0.18499   0.00000    0   0   0   0   0   0   0   0   0.000
  47 Si      0.81285   0.09042   0.00000    0   0   0   0   0   0   0   0   0.000
  48 O       0.88633   0.24663   0.00000    0   0   0   0   0   0   0   0   0.000
  49 O       0.85541   0.14591   0.00000    0   0   0   0   0   0   0   0   0.000
  50 O       0.94135   0.17152   0.94621    0   0   0   0   0   0   0   0   0.000
  51 Si      0.09316   0.81501   0.00000    0   0   0   0   0   0   0   0   0.000
  52 Si      0.18715   0.90958   0.00000    0   0   0   0   0   0   0   0   0.000
  53 O       0.11367   0.75337   0.00000    0   0   0   0   0   0   0   0   0.000
  54 O       0.14459   0.85409   0.00000    0   0   0   0   0   0   0   0   0.000
  55 O       0.05865   0.82848   0.94621    0   0   0   0   0   0   0   0   0.000
  56 Si      0.90684   0.81501   0.00000    0   0   0   0   0   0   0   0   0.000
  57 Si      0.81285   0.90958   0.00000    0   0   0   0   0   0   0   0   0.000
  58 O       0.88633   0.75337   0.00000    0   0   0   0   0   0   0   0   0.000
  59 O       0.85541   0.85409   0.00000    0   0   0   0   0   0   0   0   0.000
  60 O       0.94135   0.82848   0.05379    0   0   0   0   0   0   0   0   0.000
  61 Si      0.59316   0.50000   0.31501    0   0   0   0   0   0   0   0   0.000
  62 Si      0.68715   0.50000   0.40958    0   0   0   0   0   0   0   0   0.000
  63 O       0.61367   0.50000   0.25337    0   0   0   0   0   0   0   0   0.000
  64 O       0.64459   0.50000   0.35409    0   0   0   0   0   0   0   0   0.000
  65 O       0.55865   0.55379   0.32848    0   0   0   0   0   0   0   0   0.000
  66 Si      0.40684   0.50000   0.31501    0   0   0   0   0   0   0   0   0.000
  67 Si      0.31285   0.50000   0.40958    0   0   0   0   0   0   0   0   0.000
  68 O       0.38633   0.50000   0.25337    0   0   0   0   0   0   0   0   0.000
  69 O       0.35541   0.50000   0.35409    0   0   0   0   0   0   0   0   0.000
  70 O       0.44135   0.44621   0.32848    0   0   0   0   0   0   0   0   0.000
  71 Si      0.59316   0.50000   0.68499    0   0   0   0   0   0   0   0   0.000
  72 Si      0.68715   0.50000   0.59042    0   0   0   0   0   0   0   0   0.000
  73 O       0.61367   0.50000   0.74663    0   0   0   0   0   0   0   0   0.000
  74 O       0.64459   0.50000   0.64591    0   0   0   0   0   0   0   0   0.000
  75 O       0.55865   0.44621   0.67152    0   0   0   0   0   0   0   0   0.000
  76 Si      0.40684   0.50000   0.68499    0   0   0   0   0   0   0   0   0.000
  77 Si      0.31285   0.50000   0.59042    0   0   0   0   0   0   0   0   0.000
  78 O       0.38633   0.50000   0.74663    0   0   0   0   0   0   0   0   0.000
  79 O       0.35541   0.50000   0.64591    0   0   0   0   0   0   0   0   0.000
  80 O       0.44135   0.55379   0.67152    0   0   0   0   0   0   0   0   0.000
  81 Si      0.50000   0.68499   0.40684    0   0   0   0   0   0   0   0   0.000
  82 Si      0.50000   0.59042   0.31285    0   0   0   0   0   0   0   0   0.000
  83 O       0.50000   0.74663   0.38633    0   0   0   0   0   0   0   0   0.000
  84 O       0.50000   0.64591   0.35541    0   0   0   0   0   0   0   0   0.000
  85 O       0.55379   0.67152   0.44135    0   0   0   0   0   0   0   0   0.000
  86 Si      0.50000   0.68499   0.59316    0   0   0   0   0   0   0   0   0.000
  87 Si      0.50000   0.59042   0.68715    0   0   0   0   0   0   0   0   0.000
  88 O       0.50000   0.74663   0.61367    0   0   0   0   0   0   0   0   0.000
  89 O       0.50000   0.64591   0.64459    0   0   0   0   0   0   0   0   0.000
  90 O       0.44621   0.67152   0.55865    0   0   0   0   0   0   0   0   0.000
  91 Si      0.50000   0.31501   0.40684    0   0   0   0   0   0   0   0   0.000
  92 Si      0.50000   0.40958   0.31285    0   0   0   0   0   0   0   0   0.000
  93 O       0.50000   0.25337   0.38633    0   0   0   0   0   0   0   0   0.000
  94 O       0.50000   0.35409   0.35541    0   0   0   0   0   0   0   0   0.000
  95 O       0.44621   0.32848   0.44135    0   0   0   0   0   0   0   0   0.000
  96 Si      0.50000   0.31501   0.59316    0   0   0   0   0   0   0   0   0.000
  97 Si      0.50000   0.40958   0.68715    0   0   0   0   0   0   0   0   0.000
  98 O       0.50000   0.25337   0.61367    0   0   0   0   0   0   0   0   0.000
  99 O       0.50000   0.35409   0.64459    0   0   0   0   0   0   0   0   0.000
 100 O       0.55379   0.32848   0.55865    0   0   0   0   0   0   0   0   0.000
 101 Si      0.68499   0.59316   0.50000    0   0   0   0   0   0   0   0   0.000
 102 Si      0.59042   0.68715   0.50000    0   0   0   0   0   0   0   0   0.000
 103 O       0.74663   0.61367   0.50000    0   0   0   0   0   0   0   0   0.000
 104 O       0.64591   0.64459   0.50000    0   0   0   0   0   0   0   0   0.000
 105 O       0.67152   0.55865   0.44621    0   0   0   0   0   0   0   0   0.000
 106 Si      0.68499   0.40684   0.50000    0   0   0   0   0   0   0   0   0.000
 107 Si      0.59042   0.31285   0.50000    0   0   0   0   0   0   0   0   0.000
 108 O       0.74663   0.38633   0.50000    0   0   0   0   0   0   0   0   0.000
 109 O       0.64591   0.35541   0.50000    0   0   0   0   0   0   0   0   0.000
 110 O       0.67152   0.44135   0.55379    0   0   0   0   0   0   0   0   0.000
 111 Si      0.31501   0.59316   0.50000    0   0   0   0   0   0   0   0   0.000
 112 Si      0.40958   0.68715   0.50000    0   0   0   0   0   0   0   0   0.000
 113 O       0.25337   0.61367   0.50000    0   0   0   0   0   0   0   0   0.000
 114 O       0.35409   0.64459   0.50000    0   0   0   0   0   0   0   0   0.000
 115 O       0.32848   0.55865   0.55379    0   0   0   0   0   0   0   0   0.000
 116 Si      0.31501   0.40684   0.50000    0   0   0   0   0   0   0   0   0.000
 117 Si      0.40958   0.31285   0.50000    0   0   0   0   0   0   0   0   0.000
 118 O       0.25337   0.38633   0.50000    0   0   0   0   0   0   0   0   0.000
 119 O       0.35409   0.35541   0.50000    0   0   0   0   0   0   0   0   0.000
 120 O       0.32848   0.44135   0.44621    0   0   0   0   0   0   0   0   0.000
 121 O       0.94621   0.94135   0.82848    0   0   0   0   0   0   0   0   0.000
 122 O       0.05379   0.05865   0.82848    0   0   0   0   0   0   0   0   0.000
 123 O       0.05379   0.94135   0.17152    0   0   0   0   0   0   0   0   0.000
 124 O       0.94621   0.05865   0.17152    0   0   0   0   0   0   0   0   0.000
 125 O       0.82848   0.94621   0.94135    0   0   0   0   0   0   0   0   0.000
 126 O       0.82848   0.05379   0.05865    0   0   0   0   0   0   0   0   0.000
 127 O       0.17152   0.05379   0.94135    0   0   0   0   0   0   0   0   0.000
 128 O       0.17152   0.94621   0.05865    0   0   0   0   0   0   0   0   0.000
 129 O       0.94135   0.82848   0.94621    0   0   0   0   0   0   0   0   0.000
 130 O       0.05865   0.82848   0.05379    0   0   0   0   0   0   0   0   0.000
 131 O       0.94135   0.17152   0.05379    0   0   0   0   0   0   0   0   0.000
 132 O       0.05865   0.17152   0.94621    0   0   0   0   0   0   0   0   0.000
 133 O       0.44135   0.44621   0.67152    0   0   0   0   0   0   0   0   0.000
 134 O       0.55865   0.55379   0.67152    0   0   0   0   0   0   0   0   0.000
 135 O       0.44135   0.55379   0.32848    0   0   0   0   0   0   0   0   0.000
 136 O       0.55865   0.44621   0.32848    0   0   0   0   0   0   0   0   0.000
 137 O       0.44621   0.32848   0.55865    0   0   0   0   0   0   0   0   0.000
 138 O       0.55379   0.32848   0.44135    0   0   0   0   0   0   0   0   0.000
 139 O       0.55379   0.67152   0.55865    0   0   0   0   0   0   0   0   0.000
 140 O       0.44621   0.67152   0.44135    0   0   0   0   0   0   0   0   0.000
 141 O       0.32848   0.44135   0.55379    0   0   0   0   0   0   0   0   0.000
 142 O       0.32848   0.55865   0.44621    0   0   0   0   0   0   0   0   0.000
 143 O       0.67152   0.44135   0.44621    0   0   0   0   0   0   0   0   0.000
 144 O       0.67152   0.55865   0.55379    0   0   0   0   0   0   0   0   0.000
 145 Si      0.00000   0.59316   0.68499    0   0   0   0   0   0   0   0   0.000
 146 Si      0.00000   0.68715   0.59042    0   0   0   0   0   0   0   0   0.000
 147 O       0.00000   0.61367   0.74663    0   0   0   0   0   0   0   0   0.000
 148 O       0.00000   0.64459   0.64591    0   0   0   0   0   0   0   0   0.000
 149 O       0.05379   0.55865   0.67152    0   0   0   0   0   0   0   0   0.000
 150 Si      0.00000   0.40684   0.68499    0   0   0   0   0   0   0   0   0.000
 151 Si      0.00000   0.31285   0.59042    0   0   0   0   0   0   0   0   0.000
 152 O       0.00000   0.38633   0.74663    0   0   0   0   0   0   0   0   0.000
 153 O       0.00000   0.35541   0.64591    0   0   0   0   0   0   0   0   0.000
 154 O       0.94621   0.44135   0.67152    0   0   0   0   0   0   0   0   0.000
 155 Si      0.00000   0.59316   0.31501    0   0   0   0   0   0   0   0   0.000
 156 Si      0.00000   0.68715   0.40958    0   0   0   0   0   0   0   0   0.000
 157 O       0.00000   0.61367   0.25337    0   0   0   0   0   0   0   0   0.000
 158 O       0.00000   0.64459   0.35409    0   0   0   0   0   0   0   0   0.000
 159 O       0.94621   0.55865   0.32848    0   0   0   0   0   0   0   0   0.000
 160 Si      0.00000   0.40684   0.31501    0   0   0   0   0   0   0   0   0.000
 161 Si      0.00000   0.31285   0.40958    0   0   0   0   0   0   0   0   0.000
 162 O       0.00000   0.38633   0.25337    0   0   0   0   0   0   0   0   0.000
 163 O       0.00000   0.35541   0.35409    0   0   0   0   0   0   0   0   0.000
 164 O       0.05379   0.44135   0.32848    0   0   0   0   0   0   0   0   0.000
 165 Si      0.18499   0.50000   0.59316    0   0   0   0   0   0   0   0   0.000
 166 Si      0.09042   0.50000   0.68715    0   0   0   0   0   0   0   0   0.000
 167 O       0.24663   0.50000   0.61367    0   0   0   0   0   0   0   0   0.000
 168 O       0.14591   0.50000   0.64459    0   0   0   0   0   0   0   0   0.000
 169 O       0.17152   0.55379   0.55865    0   0   0   0   0   0   0   0   0.000
 170 Si      0.18499   0.50000   0.40684    0   0   0   0   0   0   0   0   0.000
 171 Si      0.09042   0.50000   0.31285    0   0   0   0   0   0   0   0   0.000
 172 O       0.24663   0.50000   0.38633    0   0   0   0   0   0   0   0   0.000
 173 O       0.14591   0.50000   0.35541    0   0   0   0   0   0   0   0   0.000
 174 O       0.17152   0.44621   0.44135    0   0   0   0   0   0   0   0   0.000
 175 Si      0.81501   0.50000   0.59316    0   0   0   0   0   0   0   0   0.000
 176 Si      0.90958   0.50000   0.68715    0   0   0   0   0   0   0   0   0.000
 177 O       0.75337   0.50000   0.61367    0   0   0   0   0   0   0   0   0.000
 178 O       0.85409   0.50000   0.64459    0   0   0   0   0   0   0   0   0.000
 179 O       0.82848   0.44621   0.55865    0   0   0   0   0   0   0   0   0.000
 180 Si      0.81501   0.50000   0.40684    0   0   0   0   0   0   0   0   0.000
 181 Si      0.90958   0.50000   0.31285    0   0   0   0   0   0   0   0   0.000
 182 O       0.75337   0.50000   0.38633    0   0   0   0   0   0   0   0   0.000
 183 O       0.85409   0.50000   0.35541    0   0   0   0   0   0   0   0   0.000
 184 O       0.82848   0.55379   0.44135    0   0   0   0   0   0   0   0   0.000
 185 Si      0.09316   0.68499   0.50000    0   0   0   0   0   0   0   0   0.000
 186 Si      0.18715   0.59042   0.50000    0   0   0   0   0   0   0   0   0.000
 187 O       0.11367   0.74663   0.50000    0   0   0   0   0   0   0   0   0.000
 188 O       0.14459   0.64591   0.50000    0   0   0   0   0   0   0   0   0.000
 189 O       0.05865   0.67152   0.55379    0   0   0   0   0   0   0   0   0.000
 190 Si      0.90684   0.68499   0.50000    0   0   0   0   0   0   0   0   0.000
 191 Si      0.81285   0.59042   0.50000    0   0   0   0   0   0   0   0   0.000
 192 O       0.88633   0.74663   0.50000    0   0   0   0   0   0   0   0   0.000
 193 O       0.85541   0.64591   0.50000    0   0   0   0   0   0   0   0   0.000
 194 O       0.94135   0.67152   0.44621    0   0   0   0   0   0   0   0   0.000
 195 Si      0.09316   0.31501   0.50000    0   0   0   0   0   0   0   0   0.000
 196 Si      0.18715   0.40958   0.50000    0   0   0   0   0   0   0   0   0.000
 197 O       0.11367   0.25337   0.50000    0   0   0   0   0   0   0   0   0.000
 198 O       0.14459   0.35409   0.50000    0   0   0   0   0   0   0   0   0.000
 199 O       0.05865   0.32848   0.44621    0   0   0   0   0   0   0   0   0.000
 200 Si      0.90684   0.31501   0.50000    0   0   0   0   0   0   0   0   0.000
 201 Si      0.81285   0.40958   0.50000    0   0   0   0   0   0   0   0   0.000
 202 O       0.88633   0.25337   0.50000    0   0   0   0   0   0   0   0   0.000
 203 O       0.85541   0.35409   0.50000    0   0   0   0   0   0   0   0   0.000
 204 O       0.94135   0.32848   0.55379    0   0   0   0   0   0   0   0   0.000
 205 Si      0.59316   0.00000   0.81501    0   0   0   0   0   0   0   0   0.000
 206 Si      0.68715   0.00000   0.90958    0   0   0   0   0   0   0   0   0.000
 207 O       0.61367   0.00000   0.75337    0   0   0   0   0   0   0   0   0.000
 208 O       0.64459   0.00000   0.85409    0   0   0   0   0   0   0   0   0.000
 209 O       0.55865   0.05379   0.82848    0   0   0   0   0   0   0   0   0.000
 210 Si      0.40684   0.00000   0.81501    0   0   0   0   0   0   0   0   0.000
 211 Si      0.31285   0.00000   0.90958    0   0   0   0   0   0   0   0   0.000
 212 O       0.38633   0.00000   0.75337    0   0   0   0   0   0   0   0   0.000
 213 O       0.35541   0.00000   0.85409    0   0   0   0   0   0   0   0   0.000
 214 O       0.44135   0.94621   0.82848    0   0   0   0   0   0   0   0   0.000
 215 Si      0.59316   0.00000   0.18499    0   0   0   0   0   0   0   0   0.000
 216 Si      0.68715   0.00000   0.09042    0   0   0   0   0   0   0   0   0.000
 217 O       0.61367   0.00000   0.24663    0   0   0   0   0   0   0   0   0.000
 218 O       0.64459   0.00000   0.14591    0   0   0   0   0   0   0   0   0.000
 219 O       0.55865   0.94621   0.17152    0   0   0   0   0   0   0   0   0.000
 220 Si      0.40684   0.00000   0.18499    0   0   0   0   0   0   0   0   0.000
 221 Si      0.31285   0.00000   0.09042    0   0   0   0   0   0   0   0   0.000
 222 O       0.38633   0.00000   0.24663    0   0   0   0   0   0   0   0   0.000
 223 O       0.35541   0.00000   0.14591    0   0   0   0   0   0   0   0   0.000
 224 O       0.44135   0.05379   0.17152    0   0   0   0   0   0   0   0   0.000
 225 Si      0.50000   0.18499   0.90684    0   0   0   0   0   0   0   0   0.000
 226 Si      0.50000   0.09042   0.81285    0   0   0   0   0   0   0   0   0.000
 227 O       0.50000   0.24663   0.88633    0   0   0   0   0   0   0   0   0.000
 228 O       0.50000   0.14591   0.85541    0   0   0   0   0   0   0   0   0.000
 229 O       0.55379   0.17152   0.94135    0   0   0   0   0   0   0   0   0.000
 230 Si      0.50000   0.18499   0.09316    0   0   0   0   0   0   0   0   0.000
 231 Si      0.50000   0.09042   0.18715    0   0   0   0   0   0   0   0   0.000
 232 O       0.50000   0.24663   0.11367    0   0   0   0   0   0   0   0   0.000
 233 O       0.50000   0.14591   0.14459    0   0   0   0   0   0   0   0   0.000
 234 O       0.44621   0.17152   0.05865    0   0   0   0   0   0   0   0   0.000
 235 Si      0.50000   0.81501   0.90684    0   0   0   0   0   0   0   0   0.000
 236 Si      0.50000   0.90958   0.81285    0   0   0   0   0   0   0   0   0.000
 237 O       0.50000   0.75337   0.88633    0   0   0   0   0   0   0   0   0.000
 238 O       0.50000   0.85409   0.85541    0   0   0   0   0   0   0   0   0.000
 239 O       0.44621   0.82848   0.94135    0   0   0   0   0   0   0   0   0.000
 240 Si      0.50000   0.81501   0.09316    0   0   0   0   0   0   0   0   0.000
 241 Si      0.50000   0.90958   0.18715    0   0   0   0   0   0   0   0   0.000
 242 O       0.50000   0.75337   0.11367    0   0   0   0   0   0   0   0   0.000
 243 O       0.50000   0.85409   0.14459    0   0   0   0   0   0   0   0   0.000
 244 O       0.55379   0.82848   0.05865    0   0   0   0   0   0   0   0   0.000
 245 Si      0.68499   0.09316   0.00000    0   0   0   0   0   0   0   0   0.000
 246 Si      0.59042   0.18715   0.00000    0   0   0   0   0   0   0   0   0.000
 247 O       0.74663   0.11367   0.00000    0   0   0   0   0   0   0   0   0.000
 248 O       0.64591   0.14459   0.00000    0   0   0   0   0   0   0   0   0.000
 249 O       0.67152   0.05865   0.94621    0   0   0   0   0   0   0   0   0.000
 250 Si      0.68499   0.90684   0.00000    0   0   0   0   0   0   0   0   0.000
 251 Si      0.59042   0.81285   0.00000    0   0   0   0   0   0   0   0   0.000
 252 O       0.74663   0.88633   0.00000    0   0   0   0   0   0   0   0   0.000
 253 O       0.64591   0.85541   0.00000    0   0   0   0   0   0   0   0   0.000
 254 O       0.67152   0.94135   0.05379    0   0   0   0   0   0   0   0   0.000
 255 Si      0.31501   0.09316   0.00000    0   0   0   0   0   0   0   0   0.000
 256 Si      0.40958   0.18715   0.00000    0   0   0   0   0   0   0   0   0.000
 257 O       0.25337   0.11367   0.00000    0   0   0   0   0   0   0   0   0.000
 258 O       0.35409   0.14459   0.00000    0   0   0   0   0   0   0   0   0.000
 259 O       0.32848   0.05865   0.05379    0   0   0   0   0   0   0   0   0.000
 260 Si      0.31501   0.90684   0.00000    0   0   0   0   0   0   0   0   0.000
 261 Si      0.40958   0.81285   0.00000    0   0   0   0   0   0   0   0   0.000
 262 O       0.25337   0.88633   0.00000    0   0   0   0   0   0   0   0   0.000
 263 O       0.35409   0.85541   0.00000    0   0   0   0   0   0   0   0   0.000
 264 O       0.32848   0.94135   0.94621    0   0   0   0   0   0   0   0   0.000
 265 O       0.94621   0.44135   0.32848    0   0   0   0   0   0   0   0   0.000
 266 O       0.05379   0.55865   0.32848    0   0   0   0   0   0   0   0   0.000
 267 O       0.05379   0.44135   0.67152    0   0   0   0   0   0   0   0   0.000
 268 O       0.94621   0.55865   0.67152    0   0   0   0   0   0   0   0   0.000
 269 O       0.82848   0.44621   0.44135    0   0   0   0   0   0   0   0   0.000
 270 O       0.82848   0.55379   0.55865    0   0   0   0   0   0   0   0   0.000
 271 O       0.17152   0.55379   0.44135    0   0   0   0   0   0   0   0   0.000
 272 O       0.17152   0.44621   0.55865    0   0   0   0   0   0   0   0   0.000
 273 O       0.94135   0.32848   0.44621    0   0   0   0   0   0   0   0   0.000
 274 O       0.05865   0.32848   0.55379    0   0   0   0   0   0   0   0   0.000
 275 O       0.94135   0.67152   0.55379    0   0   0   0   0   0   0   0   0.000
 276 O       0.05865   0.67152   0.44621    0   0   0   0   0   0   0   0   0.000
 277 O       0.44135   0.94621   0.17152    0   0   0   0   0   0   0   0   0.000
 278 O       0.55865   0.05379   0.17152    0   0   0   0   0   0   0   0   0.000
 279 O       0.44135   0.05379   0.82848    0   0   0   0   0   0   0   0   0.000
 280 O       0.55865   0.94621   0.82848    0   0   0   0   0   0   0   0   0.000
 281 O       0.44621   0.82848   0.05865    0   0   0   0   0   0   0   0   0.000
 282 O       0.55379   0.82848   0.94135    0   0   0   0   0   0   0   0   0.000
 283 O       0.55379   0.17152   0.05865    0   0   0   0   0   0   0   0   0.000
 284 O       0.44621   0.17152   0.94135    0   0   0   0   0   0   0   0   0.000
 285 O       0.32848   0.94135   0.05379    0   0   0   0   0   0   0   0   0.000
 286 O       0.32848   0.05865   0.94621    0   0   0   0   0   0   0   0   0.000
 287 O       0.67152   0.94135   0.94621    0   0   0   0   0   0   0   0   0.000
 288 O       0.67152   0.05865   0.05379    0   0   0   0   0   0   0   0   0.000
 289 Si      0.50000   0.09316   0.68499    0   0   0   0   0   0   0   0   0.000
 290 Si      0.50000   0.18715   0.59042    0   0   0   0   0   0   0   0   0.000
 291 O       0.50000   0.11367   0.74663    0   0   0   0   0   0   0   0   0.000
 292 O       0.50000   0.14459   0.64591    0   0   0   0   0   0   0   0   0.000
 293 O       0.55379   0.05865   0.67152    0   0   0   0   0   0   0   0   0.000
 294 Si      0.50000   0.90684   0.68499    0   0   0   0   0   0   0   0   0.000
 295 Si      0.50000   0.81285   0.59042    0   0   0   0   0   0   0   0   0.000
 296 O       0.50000   0.88633   0.74663    0   0   0   0   0   0   0   0   0.000
 297 O       0.50000   0.85541   0.64591    0   0   0   0   0   0   0   0   0.000
 298 O       0.44621   0.94135   0.67152    0   0   0   0   0   0   0   0   0.000
 299 Si      0.50000   0.09316   0.31501    0   0   0   0   0   0   0   0   0.000
 300 Si      0.50000   0.18715   0.40958    0   0   0   0   0   0   0   0   0.000
 301 O       0.50000   0.11367   0.25337    0   0   0   0   0   0   0   0   0.000
 302 O       0.50000   0.14459   0.35409    0   0   0   0   0   0   0   0   0.000
 303 O       0.44621   0.05865   0.32848    0   0   0   0   0   0   0   0   0.000
 304 Si      0.50000   0.90684   0.31501    0   0   0   0   0   0   0   0   0.000
 305 Si      0.50000   0.81285   0.40958    0   0   0   0   0   0   0   0   0.000
 306 O       0.50000   0.88633   0.25337    0   0   0   0   0   0   0   0   0.000
 307 O       0.50000   0.85541   0.35409    0   0   0   0   0   0   0   0   0.000
 308 O       0.55379   0.94135   0.32848    0   0   0   0   0   0   0   0   0.000
 309 Si      0.68499   0.00000   0.59316    0   0   0   0   0   0   0   0   0.000
 310 Si      0.59042   0.00000   0.68715    0   0   0   0   0   0   0   0   0.000
 311 O       0.74663   0.00000   0.61367    0   0   0   0   0   0   0   0   0.000
 312 O       0.64591   0.00000   0.64459    0   0   0   0   0   0   0   0   0.000
 313 O       0.67152   0.05379   0.55865    0   0   0   0   0   0   0   0   0.000
 314 Si      0.68499   0.00000   0.40684    0   0   0   0   0   0   0   0   0.000
 315 Si      0.59042   0.00000   0.31285    0   0   0   0   0   0   0   0   0.000
 316 O       0.74663   0.00000   0.38633    0   0   0   0   0   0   0   0   0.000
 317 O       0.64591   0.00000   0.35541    0   0   0   0   0   0   0   0   0.000
 318 O       0.67152   0.94621   0.44135    0   0   0   0   0   0   0   0   0.000
 319 Si      0.31501   0.00000   0.59316    0   0   0   0   0   0   0   0   0.000
 320 Si      0.40958   0.00000   0.68715    0   0   0   0   0   0   0   0   0.000
 321 O       0.25337   0.00000   0.61367    0   0   0   0   0   0   0   0   0.000
 322 O       0.35409   0.00000   0.64459    0   0   0   0   0   0   0   0   0.000
 323 O       0.32848   0.94621   0.55865    0   0   0   0   0   0   0   0   0.000
 324 Si      0.31501   0.00000   0.40684    0   0   0   0   0   0   0   0   0.000
 325 Si      0.40958   0.00000   0.31285    0   0   0   0   0   0   0   0   0.000
 326 O       0.25337   0.00000   0.38633    0   0   0   0   0   0   0   0   0.000
 327 O       0.35409   0.00000   0.35541    0   0   0   0   0   0   0   0   0.000
 328 O       0.32848   0.05379   0.44135    0   0   0   0   0   0   0   0   0.000
 329 Si      0.59316   0.18499   0.50000    0   0   0   0   0   0   0   0   0.000
 330 Si      0.68715   0.09042   0.50000    0   0   0   0   0   0   0   0   0.000
 331 O       0.61367   0.24663   0.50000    0   0   0   0   0   0   0   0   0.000
 332 O       0.64459   0.14591   0.50000    0   0   0   0   0   0   0   0   0.000
 333 O       0.55865   0.17152   0.55379    0   0   0   0   0   0   0   0   0.000
 334 Si      0.40684   0.18499   0.50000    0   0   0   0   0   0   0   0   0.000
 335 Si      0.31285   0.09042   0.50000    0   0   0   0   0   0   0   0   0.000
 336 O       0.38633   0.24663   0.50000    0   0   0   0   0   0   0   0   0.000
 337 O       0.35541   0.14591   0.50000    0   0   0   0   0   0   0   0   0.000
 338 O       0.44135   0.17152   0.44621    0   0   0   0   0   0   0   0   0.000
 339 Si      0.59316   0.81501   0.50000    0   0   0   0   0   0   0   0   0.000
 340 Si      0.68715   0.90958   0.50000    0   0   0   0   0   0   0   0   0.000
 341 O       0.61367   0.75337   0.50000    0   0   0   0   0   0   0   0   0.000
 342 O       0.64459   0.85409   0.50000    0   0   0   0   0   0   0   0   0.000
 343 O       0.55865   0.82848   0.44621    0   0   0   0   0   0   0   0   0.000
 344 Si      0.40684   0.81501   0.50000    0   0   0   0   0   0   0   0   0.000
 345 Si      0.31285   0.90958   0.50000    0   0   0   0   0   0   0   0   0.000
 346 O       0.38633   0.75337   0.50000    0   0   0   0   0   0   0   0   0.000
 347 O       0.35541   0.85409   0.50000    0   0   0   0   0   0   0   0   0.000
 348 O       0.44135   0.82848   0.55379    0   0   0   0   0   0   0   0   0.000
 349 Si      0.09316   0.50000   0.81501    0   0   0   0   0   0   0   0   0.000
 350 Si      0.18715   0.50000   0.90958    0   0   0   0   0   0   0   0   0.000
 351 O       0.11367   0.50000   0.75337    0   0   0   0   0   0   0   0   0.000
 352 O       0.14459   0.50000   0.85409    0   0   0   0   0   0   0   0   0.000
 353 O       0.05865   0.55379   0.82848    0   0   0   0   0   0   0   0   0.000
 354 Si      0.90684   0.50000   0.81501    0   0   0   0   0   0   0   0   0.000
 355 Si      0.81285   0.50000   0.90958    0   0   0   0   0   0   0   0   0.000
 356 O       0.88633   0.50000   0.75337    0   0   0   0   0   0   0   0   0.000
 357 O       0.85541   0.50000   0.85409    0   0   0   0   0   0   0   0   0.000
 358 O       0.94135   0.44621   0.82848    0   0   0   0   0   0   0   0   0.000
 359 Si      0.09316   0.50000   0.18499    0   0   0   0   0   0   0   0   0.000
 360 Si      0.18715   0.50000   0.09042    0   0   0   0   0   0   0   0   0.000
 361 O       0.11367   0.50000   0.24663    0   0   0   0   0   0   0   0   0.000
 362 O       0.14459   0.50000   0.14591    0   0   0   0   0   0   0   0   0.000
 363 O       0.05865   0.44621   0.17152    0   0   0   0   0   0   0   0   0.000
 364 Si      0.90684   0.50000   0.18499    0   0   0   0   0   0   0   0   0.000
 365 Si      0.81285   0.50000   0.09042    0   0   0   0   0   0   0   0   0.000
 366 O       0.88633   0.50000   0.24663    0   0   0   0   0   0   0   0   0.000
 367 O       0.85541   0.50000   0.14591    0   0   0   0   0   0   0   0   0.000
 368 O       0.94135   0.55379   0.17152    0   0   0   0   0   0   0   0   0.000
 369 Si      0.00000   0.68499   0.90684    0   0   0   0   0   0   0   0   0.000
 370 Si      0.00000   0.59042   0.81285    0   0   0   0   0   0   0   0   0.000
 371 O       0.00000   0.74663   0.88633    0   0   0   0   0   0   0   0   0.000
 372 O       0.00000   0.64591   0.85541    0   0   0   0   0   0   0   0   0.000
 373 O       0.05379   0.67152   0.94135    0   0   0   0   0   0   0   0   0.000
 374 Si      0.00000   0.68499   0.09316    0   0   0   0   0   0   0   0   0.000
 375 Si      0.00000   0.59042   0.18715    0   0   0   0   0   0   0   0   0.000
 376 O       0.00000   0.74663   0.11367    0   0   0   0   0   0   0   0   0.000
 377 O       0.00000   0.64591   0.14459    0   0   0   0   0   0   0   0   0.000
 378 O       0.94621   0.67152   0.05865    0   0   0   0   0   0   0   0   0.000
 379 Si      0.00000   0.31501   0.90684    0   0   0   0   0   0   0   0   0.000
 380 Si      0.00000   0.40958   0.81285    0   0   0   0   0   0   0   0   0.000
 381 O       0.00000   0.25337   0.88633    0   0   0   0   0   0   0   0   0.000
 382 O       0.00000   0.35409   0.85541    0   0   0   0   0   0   0   0   0.000
 383 O       0.94621   0.32848   0.94135    0   0   0   0   0   0   0   0   0.000
 384 Si      0.00000   0.31501   0.09316    0   0   0   0   0   0   0   0   0.000
 385 Si      0.00000   0.40958   0.18715    0   0   0   0   0   0   0   0   0.000
 386 O       0.00000   0.25337   0.11367    0   0   0   0   0   0   0   0   0.000
 387 O       0.00000   0.35409   0.14459    0   0   0   0   0   0   0   0   0.000
 388 O       0.05379   0.32848   0.05865    0   0   0   0   0   0   0   0   0.000
 389 Si      0.18499   0.59316   0.00000    0   0   0   0   0   0   0   0   0.000
 390 Si      0.09042   0.68715   0.00000    0   0   0   0   0   0   0   0   0.000
 391 O       0.24663   0.61367   0.00000    0   0   0   0   0   0   0   0   0.000
 392 O       0.14591   0.64459   0.00000    0   0   0   0   0   0   0   0   0.000
 393 O       0.17152   0.55865   0.94621    0   0   0   0   0   0   0   0   0.000
 394 Si      0.18499   0.40684   0.00000    0   0   0   0   0   0   0   0   0.000
 395 Si      0.09042   0.31285   0.00000    0   0   0   0   0   0   0   0   0.000
 396 O       0.24663   0.38633   0.00000    0   0   0   0   0   0   0   0   0.000
 397 O       0.14591   0.35541   0.00000    0   0   0   0   0   0   0   0   0.000
 398 O       0.17152   0.44135   0.05379    0   0   0   0   0   0   0   0   0.000
 399 Si      0.81501   0.59316   0.00000    0   0   0   0   0   0   0   0   0.000
 400 Si      0.90958   0.68715   0.00000    0   0   0   0   0   0   0   0   0.000
 401 O       0.75337   0.61367   0.00000    0   0   0   0   0   0   0   0   0.000
 402 O       0.85409   0.64459   0.00000    0   0   0   0   0   0   0   0   0.000
 403 O       0.82848   0.55865   0.05379    0   0   0   0   0   0   0   0   0.000
 404 Si      0.81501   0.40684   0.00000    0   0   0   0   0   0   0   0   0.000
 405 Si      0.90958   0.31285   0.00000    0   0   0   0   0   0   0   0   0.000
 406 O       0.75337   0.38633   0.00000    0   0   0   0   0   0   0   0   0.000
 407 O       0.85409   0.35541   0.00000    0   0   0   0   0   0   0   0   0.000
 408 O       0.82848   0.44135   0.94621    0   0   0   0   0   0   0   0   0.000
 409 O       0.44621   0.94135   0.32848    0   0   0   0   0   0   0   0   0.000
 410 O       0.55379   0.05865   0.32848    0   0   0   0   0   0   0   0   0.000
 411 O       0.55379   0.94135   0.67152    0   0   0   0   0   0   0   0   0.000
 412 O       0.44621   0.05865   0.67152    0   0   0   0   0   0   0   0   0.000
 413 O       0.32848   0.94621   0.44135    0   0   0   0   0   0   0   0   0.000
 414 O       0.32848   0.05379   0.55865    0   0   0   0   0   0   0   0   0.000
 415 O       0.67152   0.05379   0.44135    0   0   0   0   0   0   0   0   0.000
 416 O       0.67152   0.94621   0.55865    0   0   0   0   0   0   0   0   0.000
 417 O       0.44135   0.82848   0.44621    0   0   0   0   0   0   0   0   0.000
 418 O       0.55865   0.82848   0.55379    0   0   0   0   0   0   0   0   0.000
 419 O       0.44135   0.17152   0.55379    0   0   0   0   0   0   0   0   0.000
 420 O       0.55865   0.17152   0.44621    0   0   0   0   0   0   0   0   0.000
 421 O       0.94135   0.44621   0.17152    0   0   0   0   0   0   0   0   0.000
 422 O       0.05865   0.55379   0.17152    0   0   0   0   0   0   0   0   0.000
 423 O       0.94135   0.55379   0.82848    0   0   0   0   0   0   0   0   0.000
 424 O       0.05865   0.44621   0.82848    0   0   0   0   0   0   0   0   0.000
 425 O       0.94621   0.32848   0.05865    0   0   0   0   0   0   0   0   0.000
 426 O       0.05379   0.32848   0.94135    0   0   0   0   0   0   0   0   0.000
 427 O       0.05379   0.67152   0.05865    0   0   0   0   0   0   0   0   0.000
 428 O       0.94621   0.67152   0.94135    0   0   0   0   0   0   0   0   0.000
 429 O       0.82848   0.44135   0.05379    0   0   0   0   0   0   0   0   0.000
 430 O       0.82848   0.55865   0.94621    0   0   0   0   0   0   0   0   0.000
 431 O       0.17152   0.44135   0.94621    0   0   0   0   0   0   0   0   0.000
 432 O       0.17152   0.55865   0.05379    0   0   0   0   0   0   0   0   0.000
 433 Si      0.50000   0.59316   0.18499    0   0   0   0   0   0   0   0   0.000
 434 Si      0.50000   0.68715   0.09042    0   0   0   0   0   0   0   0   0.000
 435 O       0.50000   0.61367   0.24663    0   0   0   0   0   0   0   0   0.000
 436 O       0.50000   0.64459   0.14591    0   0   0   0   0   0   0   0   0.000
 437 O       0.55379   0.55865   0.17152    0   0   0   0   0   0   0   0   0.000
 438 Si      0.50000   0.40684   0.18499    0   0   0   0   0   0   0   0   0.000
 439 Si      0.50000   0.31285   0.09042    0   0   0   0   0   0   0   0   0.000
 440 O       0.50000   0.38633   0.24663    0   0   0   0   0   0   0   0   0.000
 441 O       0.50000   0.35541   0.14591    0   0   0   0   0   0   0   0   0.000
 442 O       0.44621   0.44135   0.17152    0   0   0   0   0   0   0   0   0.000
 443 Si      0.50000   0.59316   0.81501    0   0   0   0   0   0   0   0   0.000
 444 Si      0.50000   0.68715   0.90958    0   0   0   0   0   0   0   0   0.000
 445 O       0.50000   0.61367   0.75337    0   0   0   0   0   0   0   0   0.000
 446 O       0.50000   0.64459   0.85409    0   0   0   0   0   0   0   0   0.000
 447 O       0.44621   0.55865   0.82848    0   0   0   0   0   0   0   0   0.000
 448 Si      0.50000   0.40684   0.81501    0   0   0   0   0   0   0   0   0.000
 449 Si      0.50000   0.31285   0.90958    0   0   0   0   0   0   0   0   0.000
 450 O       0.50000   0.38633   0.75337    0   0   0   0   0   0   0   0   0.000
 451 O       0.50000   0.35541   0.85409    0   0   0   0   0   0   0   0   0.000
 452 O       0.55379   0.44135   0.82848    0   0   0   0   0   0   0   0   0.000
 453 Si      0.68499   0.50000   0.09316    0   0   0   0   0   0   0   0   0.000
 454 Si      0.59042   0.50000   0.18715    0   0   0   0   0   0   0   0   0.000
 455 O       0.74663   0.50000   0.11367    0   0   0   0   0   0   0   0   0.000
 456 O       0.64591   0.50000   0.14459    0   0   0   0   0   0   0   0   0.000
 457 O       0.67152   0.55379   0.05865    0   0   0   0   0   0   0   0   0.000
 458 Si      0.68499   0.50000   0.90684    0   0   0   0   0   0   0   0   0.000
 459 Si      0.59042   0.50000   0.81285    0   0   0   0   0   0   0   0   0.000
 460 O       0.74663   0.50000   0.88633    0   0   0   0   0   0   0   0   0.000
 461 O       0.64591   0.50000   0.85541    0   0   0   0   0   0   0   0   0.000
 462 O       0.67152   0.44621   0.94135    0   0   0   0   0   0   0   0   0.000
 463 Si      0.31501   0.50000   0.09316    0   0   0   0   0   0   0   0   0.000
 464 Si      0.40958   0.50000   0.18715    0   0   0   0   0   0   0   0   0.000
 465 O       0.25337   0.50000   0.11367    0   0   0   0   0   0   0   0   0.000
 466 O       0.35409   0.50000   0.14459    0   0   0   0   0   0   0   0   0.000
 467 O       0.32848   0.44621   0.05865    0   0   0   0   0   0   0   0   0.000
 468 Si      0.31501   0.50000   0.90684    0   0   0   0   0   0   0   0   0.000
 469 Si      0.40958   0.50000   0.81285    0   0   0   0   0   0   0   0   0.000
 470 O       0.25337   0.50000   0.88633    0   0   0   0   0   0   0   0   0.000
 471 O       0.35409   0.50000   0.85541    0   0   0   0   0   0   0   0   0.000
 472 O       0.32848   0.55379   0.94135    0   0   0   0   0   0   0   0   0.000
 473 Si      0.59316   0.68499   0.00000    0   0   0   0   0   0   0   0   0.000
 474 Si      0.68715   0.59042   0.00000    0   0   0   0   0   0   0   0   0.000
 475 O       0.61367   0.74663   0.00000    0   0   0   0   0   0   0   0   0.000
 476 O       0.64459   0.64591   0.00000    0   0   0   0   0   0   0   0   0.000
 477 O       0.55865   0.67152   0.05379    0   0   0   0   0   0   0   0   0.000
 478 Si      0.40684   0.68499   0.00000    0   0   0   0   0   0   0   0   0.000
 479 Si      0.31285   0.59042   0.00000    0   0   0   0   0   0   0   0   0.000
 480 O       0.38633   0.74663   0.00000    0   0   0   0   0   0   0   0   0.000
 481 O       0.35541   0.64591   0.00000    0   0   0   0   0   0   0   0   0.000
 482 O       0.44135   0.67152   0.94621    0   0   0   0   0   0   0   0   0.000
 483 Si      0.59316   0.31501   0.00000    0   0   0   0   0   0   0   0   0.000
 484 Si      0.68715   0.40958   0.00000    0   0   0   0   0   0   0   0   0.000
 485 O       0.61367   0.25337   0.00000    0   0   0   0   0   0   0   0   0.000
 486 O       0.64459   0.35409   0.00000    0   0   0   0   0   0   0   0   0.000
 487 O       0.55865   0.32848   0.94621    0   0   0   0   0   0   0   0   0.000
 488 Si      0.40684   0.31501   0.00000    0   0   0   0   0   0   0   0   0.000
 489 Si      0.31285   0.40958   0.00000    0   0   0   0   0   0   0   0   0.000
 490 O       0.38633   0.25337   0.00000    0   0   0   0   0   0   0   0   0.000
 491 O       0.35541   0.35409   0.00000    0   0   0   0   0   0   0   0   0.000
 492 O       0.44135   0.32848   0.05379    0   0   0   0   0   0   0   0   0.000
 493 Si      0.09316   0.00000   0.31501    0   0   0   0   0   0   0   0   0.000
 494 Si      0.18715   0.00000   0.40958    0   0   0   0   0   0   0   0   0.000
 495 O       0.11367   0.00000   0.25337    0   0   0   0   0   0   0   0   0.000
 496 O       0.14459   0.00000   0.35409    0   0   0   0   0   0   0   0   0.000
 497 O       0.05865   0.05379   0.32848    0   0   0   0   0   0   0   0   0.000
 498 Si      0.90684   0.00000   0.31501    0   0   0   0   0   0   0   0   0.000
 499 Si      0.81285   0.00000   0.40958    0   0   0   0   0   0   0   0   0.000
 500 O       0.88633   0.00000   0.25337    0   0   0   0   0   0   0   0   0.000
 501 O       0.85541   0.00000   0.35409    0   0   0   0   0   0   0   0   0.000
 502 O       0.94135   0.94621   0.32848    0   0   0   0   0   0   0   0   0.000
 503 Si      0.09316   0.00000   0.68499    0   0   0   0   0   0   0   0   0.000
 504 Si      0.18715   0.00000   0.59042    0   0   0   0   0   0   0   0   0.000
 505 O       0.11367   0.00000   0.74663    0   0   0   0   0   0   0   0   0.000
 506 O       0.14459   0.00000   0.64591    0   0   0   0   0   0   0   0   0.000
 507 O       0.05865   0.94621   0.67152    0   0   0   0   0   0   0   0   0.000
 508 Si      0.90684   0.00000   0.68499    0   0   0   0   0   0   0   0   0.000
 509 Si      0.81285   0.00000   0.59042    0   0   0   0   0   0   0   0   0.000
 510 O       0.88633   0.00000   0.74663    0   0   0   0   0   0   0   0   0.000
 511 O       0.85541   0.00000   0.64591    0   0   0   0   0   0   0   0   0.000
 512 O       0.94135   0.05379   0.67152    0   0   0   0   0   0   0   0   0.000
 513 Si      0.00000   0.18499   0.40684    0   0   0   0   0   0   0   0   0.000
 514 Si      0.00000   0.09042   0.31285    0   0   0   0   0   0   0   0   0.000
 515 O       0.00000   0.24663   0.38633    0   0   0   0   0   0   0   0   0.000
 516 O       0.00000   0.14591   0.35541    0   0   0   0   0   0   0   0   0.000
 517 O       0.05379   0.17152   0.44135    0   0   0   0   0   0   0   0   0.000
 518 Si      0.00000   0.18499   0.59316    0   0   0   0   0   0   0   0   0.000
 519 Si      0.00000   0.09042   0.68715    0   0   0   0   0   0   0   0   0.000
 520 O       0.00000   0.24663   0.61367    0   0   0   0   0   0   0   0   0.000
 521 O       0.00000   0.14591   0.64459    0   0   0   0   0   0   0   0   0.000
 522 O       0.94621   0.17152   0.55865    0   0   0   0   0   0   0   0   0.000
 523 Si      0.00000   0.81501   0.40684    0   0   0   0   0   0   0   0   0.000
 524 Si      0.00000   0.90958   0.31285    0   0   0   0   0   0   0   0   0.000
 525 O       0.00000   0.75337   0.38633    0   0   0   0   0   0   0   0   0.000
 526 O       0.00000   0.85409   0.35541    0   0   0   0   0   0   0   0   0.000
 527 O       0.94621   0.82848   0.44135    0   0   0   0   0   0   0   0   0.000
 528 Si      0.00000   0.81501   0.59316    0   0   0   0   0   0   0   0   0.000
 529 Si      0.00000   0.90958   0.68715    0   0   0   0   0   0   0   0   0.000
 530 O       0.00000   0.75337   0.61367    0   0   0   0   0   0   0   0   0.000
 531 O       0.00000   0.85409   0.64459    0   0   0   0   0   0   0   0   0.000
 532 O       0.05379   0.82848   0.55865    0   0   0   0   0   0   0   0   0.000
 533 Si      0.18499   0.09316   0.50000    0   0   0   0   0   0   0   0   0.000
 534 Si      0.09042   0.18715   0.50000    0   0   0   0   0   0   0   0   0.000
 535 O       0.24663   0.11367   0.50000    0   0   0   0   0   0   0   0   0.000
 536 O       0.14591   0.14459   0.50000    0   0   0   0   0   0   0   0   0.000
 537 O       0.17152   0.05865   0.44621    0   0   0   0   0   0   0   0   0.000
 538 Si      0.18499   0.90684   0.50000    0   0   0   0   0   0   0   0   0.000
 539 Si      0.09042   0.81285   0.50000    0   0   0   0   0   0   0   0   0.000
 540 O       0.24663   0.88633   0.50000    0   0   0   0   0   0   0   0   0.000
 541 O       0.14591   0.85541   0.50000    0   0   0   0   0   0   0   0   0.000
 542 O       0.17152   0.94135   0.55379    0   0   0   0   0   0   0   0   0.000
 543 Si      0.81501   0.09316   0.50000    0   0   0   0   0   0   0   0   0.000
 544 Si      0.90958   0.18715   0.50000    0   0   0   0   0   0   0   0   0.000
 545 O       0.75337   0.11367   0.50000    0   0   0   0   0   0   0   0   0.000
 546 O       0.85409   0.14459   0.50000    0   0   0   0   0   0   0   0   0.000
 547 O       0.82848   0.05865   0.55379    0   0   0   0   0   0   0   0   0.000
 548 Si      0.81501   0.90684   0.50000    0   0   0   0   0   0   0   0   0.000
 549 Si      0.90958   0.81285   0.50000    0   0   0   0   0   0   0   0   0.000
 550 O       0.75337   0.88633   0.50000    0   0   0   0   0   0   0   0   0.000
 551 O       0.85409   0.85541   0.50000    0   0   0   0   0   0   0   0   0.000
 552 O       0.82848   0.94135   0.44621    0   0   0   0   0   0   0   0   0.000
 553 O       0.44621   0.44135   0.82848    0   0   0   0   0   0   0   0   0.000
 554 O       0.55379   0.55865   0.82848    0   0   0   0   0   0   0   0   0.000
 555 O       0.55379   0.44135   0.17152    0   0   0   0   0   0   0   0   0.000
 556 O       0.44621   0.55865   0.17152    0   0   0   0   0   0   0   0   0.000
 557 O       0.32848   0.44621   0.94135    0   0   0   0   0   0   0   0   0.000
 558 O       0.32848   0.55379   0.05865    0   0   0   0   0   0   0   0   0.000
 559 O       0.67152   0.55379   0.94135    0   0   0   0   0   0   0   0   0.000
 560 O       0.67152   0.44621   0.05865    0   0   0   0   0   0   0   0   0.000
 561 O       0.44135   0.32848   0.94621    0   0   0   0   0   0   0   0   0.000
 562 O       0.55865   0.32848   0.05379    0   0   0   0   0   0   0   0   0.000
 563 O       0.44135   0.67152   0.05379    0   0   0   0   0   0   0   0   0.000
 564 O       0.55865   0.67152   0.94621    0   0   0   0   0   0   0   0   0.000
 565 O       0.94135   0.94621   0.67152    0   0   0   0   0   0   0   0   0.000
 566 O       0.05865   0.05379   0.67152    0   0   0   0   0   0   0   0   0.000
 567 O       0.94135   0.05379   0.32848    0   0   0   0   0   0   0   0   0.000
 568 O       0.05865   0.94621   0.32848    0   0   0   0   0   0   0   0   0.000
 569 O       0.94621   0.82848   0.55865    0   0   0   0   0   0   0   0   0.000
 570 O       0.05379   0.82848   0.44135    0   0   0   0   0   0   0   0   0.000
 571 O       0.05379   0.17152   0.55865    0   0   0   0   0   0   0   0   0.000
 572 O       0.94621   0.17152   0.44135    0   0   0   0   0   0   0   0   0.000
 573 O       0.82848   0.94135   0.55379    0   0   0   0   0   0   0   0   0.000
 574 O       0.82848   0.05865   0.44621    0   0   0   0   0   0   0   0   0.000
 575 O       0.17152   0.94135   0.44621    0   0   0   0   0   0   0   0   0.000
 576 O       0.17152   0.05865   0.55379    0   0   0   0   0   0   0   0   0.000
