# Supplementary material for: Diffusion in confinement: kinetic simulations of self- and collective diffusion behavior of adsorbed gases
Source: Royal Society of Chemistry journal article supplement (doi:10.1039/c2cp41147d), 2012-01-01
Supplement: c2cp41147d_3.cssr [file c2cp41147d_3.cssr]

                                  20.09  19.738  13.142
                   90.0  90.0  90.0  SPGR =  1 P 1         OPT = 1
288   0
0 MFI       : MFI
  1 O  0.5012  0.0699  0.7018  0  0  0  0  0  0  0  0  0.00
  2 O  0.0012  0.4301  0.7982  0  0  0  0  0  0  0  0  0.00
  3 O  0.4988  0.5699  0.2982  0  0  0  0  0  0  0  0  0.00
  4 O  0.9988  0.9301  0.2018  0  0  0  0  0  0  0  0  0.00
  5 O  0.4988  0.9301  0.2982  0  0  0  0  0  0  0  0  0.00
  6 O  0.9988  0.5699  0.2018  0  0  0  0  0  0  0  0  0.00
  7 O  0.5012  0.4301  0.7018  0  0  0  0  0  0  0  0  0.00
  8 O  0.0012  0.0699  0.7982  0  0  0  0  0  0  0  0  0.00
  9 O  0.3875  0.0743  0.8008  0  0  0  0  0  0  0  0  0.00
  10 O  0.8875  0.4257  0.6992  0  0  0  0  0  0  0  0  0.00
  11 O  0.6125  0.5743  0.1992  0  0  0  0  0  0  0  0  0.00
  12 O  0.1125  0.9257  0.3008  0  0  0  0  0  0  0  0  0.00
  13 O  0.6125  0.9257  0.1992  0  0  0  0  0  0  0  0  0.00
  14 O  0.1125  0.5743  0.3008  0  0  0  0  0  0  0  0  0.00
  15 O  0.3875  0.4257  0.8008  0  0  0  0  0  0  0  0  0.00
  16 O  0.8875  0.0743  0.6992  0  0  0  0  0  0  0  0  0.00
  17 O  0.3995  0.1366  0.6251  0  0  0  0  0  0  0  0  0.00
  18 O  0.8995  0.3634  0.8749  0  0  0  0  0  0  0  0  0.00
  19 O  0.6005  0.6366  0.3749  0  0  0  0  0  0  0  0  0.00
  20 O  0.1005  0.8634  0.1251  0  0  0  0  0  0  0  0  0.00
  21 O  0.6005  0.8634  0.3749  0  0  0  0  0  0  0  0  0.00
  22 O  0.1005  0.6366  0.1251  0  0  0  0  0  0  0  0  0.00
  23 O  0.3995  0.3634  0.6251  0  0  0  0  0  0  0  0  0.00
  24 O  0.8995  0.1366  0.8749  0  0  0  0  0  0  0  0  0.00
  25 O  0.3972  0.0034  0.6326  0  0  0  0  0  0  0  0  0.00
  26 O  0.8972  0.4966  0.8674  0  0  0  0  0  0  0  0  0.00
  27 O  0.6028  0.5034  0.3674  0  0  0  0  0  0  0  0  0.00
  28 O  0.1028  0.9966  0.1326  0  0  0  0  0  0  0  0  0.00
  29 O  0.6028  0.9966  0.3674  0  0  0  0  0  0  0  0  0.00
  30 O  0.1028  0.5034  0.1326  0  0  0  0  0  0  0  0  0.00
  31 O  0.3972  0.4966  0.6326  0  0  0  0  0  0  0  0  0.00
  32 O  0.8972  0.0034  0.8674  0  0  0  0  0  0  0  0  0.00
  33 O  0.329  0.0385  0.9722  0  0  0  0  0  0  0  0  0.00
  34 O  0.829  0.4615  0.5278  0  0  0  0  0  0  0  0  0.00
  35 O  0.671  0.5385  0.0278  0  0  0  0  0  0  0  0  0.00
  36 O  0.171  0.9615  0.4722  0  0  0  0  0  0  0  0  0.00
  37 O  0.671  0.9615  0.0278  0  0  0  0  0  0  0  0  0.00
  38 O  0.171  0.5385  0.4722  0  0  0  0  0  0  0  0  0.00
  39 O  0.329  0.4615  0.9722  0  0  0  0  0  0  0  0  0.00
  40 O  0.829  0.0385  0.5278  0  0  0  0  0  0  0  0  0.00
  41 O  0.3297  0.9555  0.8155  0  0  0  0  0  0  0  0  0.00
  42 O  0.8297  0.5445  0.6845  0  0  0  0  0  0  0  0  0.00
  43 O  0.6703  0.4555  0.1845  0  0  0  0  0  0  0  0  0.00
  44 O  0.1703  0.0445  0.3155  0  0  0  0  0  0  0  0  0.00
  45 O  0.6703  0.0445  0.1845  0  0  0  0  0  0  0  0  0.00
  46 O  0.1703  0.4555  0.3155  0  0  0  0  0  0  0  0  0.00
  47 O  0.3297  0.5445  0.8155  0  0  0  0  0  0  0  0  0.00
  48 O  0.8297  0.9555  0.6845  0  0  0  0  0  0  0  0  0.00
  49 O  0.2571  0.0663  0.8106  0  0  0  0  0  0  0  0  0.00
  50 O  0.7571  0.4337  0.6894  0  0  0  0  0  0  0  0  0.00
  51 O  0.7429  0.5663  0.1894  0  0  0  0  0  0  0  0  0.00
  52 O  0.2429  0.9337  0.3106  0  0  0  0  0  0  0  0  0.00
  53 O  0.7429  0.9337  0.1894  0  0  0  0  0  0  0  0  0.00
  54 O  0.2429  0.5663  0.3106  0  0  0  0  0  0  0  0  0.00
  55 O  0.2571  0.4337  0.8106  0  0  0  0  0  0  0  0  0.00
  56 O  0.7571  0.0663  0.6894  0  0  0  0  0  0  0  0  0.00
  57 O  0.291  0.1296  0.106  0  0  0  0  0  0  0  0  0.00
  58 O  0.791  0.3704  0.394  0  0  0  0  0  0  0  0  0.00
  59 O  0.709  0.6296  0.894  0  0  0  0  0  0  0  0  0.00
  60 O  0.209  0.8704  0.606  0  0  0  0  0  0  0  0  0.00
  61 O  0.709  0.8704  0.894  0  0  0  0  0  0  0  0  0.00
  62 O  0.209  0.6296  0.606  0  0  0  0  0  0  0  0  0.00
  63 O  0.291  0.3704  0.106  0  0  0  0  0  0  0  0  0.00
  64 O  0.791  0.1296  0.394  0  0  0  0  0  0  0  0  0.00
  65 O  0.2034  0.0455  0.0275  0  0  0  0  0  0  0  0  0.00
  66 O  0.7034  0.4545  0.4725  0  0  0  0  0  0  0  0  0.00
  67 O  0.7966  0.5455  0.9725  0  0  0  0  0  0  0  0  0.00
  68 O  0.2966  0.9545  0.5275  0  0  0  0  0  0  0  0  0.00
  69 O  0.7966  0.9545  0.9725  0  0  0  0  0  0  0  0  0.00
  70 O  0.2966  0.5455  0.5275  0  0  0  0  0  0  0  0  0.00
  71 O  0.2034  0.4545  0.0275  0  0  0  0  0  0  0  0  0.00
  72 O  0.7034  0.0455  0.4725  0  0  0  0  0  0  0  0  0.00
  73 O  0.2936  0.001  0.1564  0  0  0  0  0  0  0  0  0.00
  74 O  0.7936  0.499  0.3436  0  0  0  0  0  0  0  0  0.00
  75 O  0.7064  0.501  0.8436  0  0  0  0  0  0  0  0  0.00
  76 O  0.2064  0.999  0.6564  0  0  0  0  0  0  0  0  0.00
  77 O  0.7064  0.999  0.8436  0  0  0  0  0  0  0  0  0.00
  78 O  0.2064  0.501  0.6564  0  0  0  0  0  0  0  0  0.00
  79 O  0.2936  0.499  0.1564  0  0  0  0  0  0  0  0  0.00
  80 O  0.7936  0.001  0.3436  0  0  0  0  0  0  0  0  0.00
  81 O  0.1075  0.1265  0.0883  0  0  0  0  0  0  0  0  0.00
  82 O  0.6075  0.3735  0.4117  0  0  0  0  0  0  0  0  0.00
  83 O  0.8925  0.6265  0.9117  0  0  0  0  0  0  0  0  0.00
  84 O  0.3925  0.8735  0.5883  0  0  0  0  0  0  0  0  0.00
  85 O  0.8925  0.8735  0.9117  0  0  0  0  0  0  0  0  0.00
  86 O  0.3925  0.6265  0.5883  0  0  0  0  0  0  0  0  0.00
  87 O  0.1075  0.3735  0.0883  0  0  0  0  0  0  0  0  0.00
  88 O  0.6075  0.1265  0.4117  0  0  0  0  0  0  0  0  0.00
  89 O  0.0846  0.037  0.9443  0  0  0  0  0  0  0  0  0.00
  90 O  0.5846  0.463  0.5557  0  0  0  0  0  0  0  0  0.00
  91 O  0.9154  0.537  0.0557  0  0  0  0  0  0  0  0  0.00
  92 O  0.4154  0.963  0.4443  0  0  0  0  0  0  0  0  0.00
  93 O  0.9154  0.963  0.0557  0  0  0  0  0  0  0  0  0.00
  94 O  0.4154  0.537  0.4443  0  0  0  0  0  0  0  0  0.00
  95 O  0.0846  0.463  0.9443  0  0  0  0  0  0  0  0  0.00
  96 O  0.5846  0.037  0.5557  0  0  0  0  0  0  0  0  0.00
  97 O  0.1301  0.0781  0.767  0  0  0  0  0  0  0  0  0.00
  98 O  0.6301  0.4219  0.733  0  0  0  0  0  0  0  0  0.00
  99 O  0.8699  0.5781  0.233  0  0  0  0  0  0  0  0  0.00
  100 O  0.3699  0.9219  0.267  0  0  0  0  0  0  0  0  0.00
  101 O  0.8699  0.9219  0.233  0  0  0  0  0  0  0  0  0.00
  102 O  0.3699  0.5781  0.267  0  0  0  0  0  0  0  0  0.00
  103 O  0.1301  0.4219  0.767  0  0  0  0  0  0  0  0  0.00
  104 O  0.6301  0.0781  0.733  0  0  0  0  0  0  0  0  0.00
  105 O  0.0728  0.9589  0.7832  0  0  0  0  0  0  0  0  0.00
  106 O  0.5728  0.5411  0.7168  0  0  0  0  0  0  0  0  0.00
  107 O  0.9272  0.4589  0.2168  0  0  0  0  0  0  0  0  0.00
  108 O  0.4272  0.0411  0.2832  0  0  0  0  0  0  0  0  0.00
  109 O  0.9272  0.0411  0.2168  0  0  0  0  0  0  0  0  0.00
  110 O  0.4272  0.4589  0.2832  0  0  0  0  0  0  0  0  0.00
  111 O  0.0728  0.5411  0.7832  0  0  0  0  0  0  0  0  0.00
  112 O  0.5728  0.9589  0.7168  0  0  0  0  0  0  0  0  0.00
  113 O  0.2201  0.1313  0.6456  0  0  0  0  0  0  0  0  0.00
  114 O  0.7201  0.3687  0.8544  0  0  0  0  0  0  0  0  0.00
  115 O  0.7799  0.6313  0.3544  0  0  0  0  0  0  0  0  0.00
  116 O  0.2799  0.8687  0.1456  0  0  0  0  0  0  0  0  0.00
  117 O  0.7799  0.8687  0.3544  0  0  0  0  0  0  0  0  0.00
  118 O  0.2799  0.6313  0.1456  0  0  0  0  0  0  0  0  0.00
  119 O  0.2201  0.3687  0.6456  0  0  0  0  0  0  0  0  0.00
  120 O  0.7201  0.1313  0.8544  0  0  0  0  0  0  0  0  0.00
  121 O  0.4911  0.8548  0.7169  0  0  0  0  0  0  0  0  0.00
  122 O  0.9911  0.6452  0.7831  0  0  0  0  0  0  0  0  0.00
  123 O  0.5089  0.3548  0.2831  0  0  0  0  0  0  0  0  0.00
  124 O  0.0089  0.1452  0.2169  0  0  0  0  0  0  0  0  0.00
  125 O  0.5089  0.1452  0.2831  0  0  0  0  0  0  0  0  0.00
  126 O  0.0089  0.3548  0.2169  0  0  0  0  0  0  0  0  0.00
  127 O  0.4911  0.6452  0.7169  0  0  0  0  0  0  0  0  0.00
  128 O  0.9911  0.8548  0.7831  0  0  0  0  0  0  0  0  0.00
  129 O  0.3681  0.8311  0.7743  0  0  0  0  0  0  0  0  0.00
  130 O  0.8681  0.6689  0.7257  0  0  0  0  0  0  0  0  0.00
  131 O  0.6319  0.3311  0.2257  0  0  0  0  0  0  0  0  0.00
  132 O  0.1319  0.1689  0.2743  0  0  0  0  0  0  0  0  0.00
  133 O  0.6319  0.1689  0.2257  0  0  0  0  0  0  0  0  0.00
  134 O  0.1319  0.3311  0.2743  0  0  0  0  0  0  0  0  0.00
  135 O  0.3681  0.6689  0.7743  0  0  0  0  0  0  0  0  0.00
  136 O  0.8681  0.8311  0.7257  0  0  0  0  0  0  0  0  0.00
  137 O  0.4263  0.75  0.6431  0  0  0  0  0  0  0  0  0.00
  138 O  0.9263  0.75  0.8569  0  0  0  0  0  0  0  0  0.00
  139 O  0.5737  0.25  0.3569  0  0  0  0  0  0  0  0  0.00
  140 O  0.0737  0.25  0.1431  0  0  0  0  0  0  0  0  0.00
  141 O  0.3217  0.8611  0.9561  0  0  0  0  0  0  0  0  0.00
  142 O  0.8217  0.6389  0.5439  0  0  0  0  0  0  0  0  0.00
  143 O  0.6783  0.3611  0.0439  0  0  0  0  0  0  0  0  0.00
  144 O  0.1783  0.1389  0.4561  0  0  0  0  0  0  0  0  0.00
  145 O  0.6783  0.1389  0.0439  0  0  0  0  0  0  0  0  0.00
  146 O  0.1783  0.3611  0.4561  0  0  0  0  0  0  0  0  0.00
  147 O  0.3217  0.6389  0.9561  0  0  0  0  0  0  0  0  0.00
  148 O  0.8217  0.8611  0.5439  0  0  0  0  0  0  0  0  0.00
  149 O  0.241  0.8582  0.799  0  0  0  0  0  0  0  0  0.00
  150 O  0.741  0.6418  0.701  0  0  0  0  0  0  0  0  0.00
  151 O  0.759  0.3582  0.201  0  0  0  0  0  0  0  0  0.00
  152 O  0.259  0.1418  0.299  0  0  0  0  0  0  0  0  0.00
  153 O  0.759  0.1418  0.201  0  0  0  0  0  0  0  0  0.00
  154 O  0.259  0.3582  0.299  0  0  0  0  0  0  0  0  0.00
  155 O  0.241  0.6418  0.799  0  0  0  0  0  0  0  0  0.00
  156 O  0.741  0.8582  0.701  0  0  0  0  0  0  0  0  0.00
  157 O  0.2943  0.75  0.0579  0  0  0  0  0  0  0  0  0.00
  158 O  0.7943  0.75  0.4421  0  0  0  0  0  0  0  0  0.00
  159 O  0.7057  0.25  0.9421  0  0  0  0  0  0  0  0  0.00
  160 O  0.2057  0.25  0.5579  0  0  0  0  0  0  0  0  0.00
  161 O  0.1976  0.8313  0.0003  0  0  0  0  0  0  0  0  0.00
  162 O  0.6976  0.6687  0.4997  0  0  0  0  0  0  0  0  0.00
  163 O  0.8024  0.3313  0.9997  0  0  0  0  0  0  0  0  0.00
  164 O  0.3024  0.1687  0.5003  0  0  0  0  0  0  0  0  0.00
  165 O  0.8024  0.1687  0.9997  0  0  0  0  0  0  0  0  0.00
  166 O  0.3024  0.3313  0.5003  0  0  0  0  0  0  0  0  0.00
  167 O  0.1976  0.6687  0.0003  0  0  0  0  0  0  0  0  0.00
  168 O  0.6976  0.8313  0.4997  0  0  0  0  0  0  0  0  0.00
  169 O  0.0948  0.75  0.0205  0  0  0  0  0  0  0  0  0.00
  170 O  0.5948  0.75  0.4795  0  0  0  0  0  0  0  0  0.00
  171 O  0.9052  0.25  0.9795  0  0  0  0  0  0  0  0  0.00
  172 O  0.4052  0.25  0.5205  0  0  0  0  0  0  0  0  0.00
  173 O  0.0809  0.867  0.9275  0  0  0  0  0  0  0  0  0.00
  174 O  0.5809  0.633  0.5725  0  0  0  0  0  0  0  0  0.00
  175 O  0.9191  0.367  0.0725  0  0  0  0  0  0  0  0  0.00
  176 O  0.4191  0.133  0.4275  0  0  0  0  0  0  0  0  0.00
  177 O  0.9191  0.133  0.0725  0  0  0  0  0  0  0  0  0.00
  178 O  0.4191  0.367  0.4275  0  0  0  0  0  0  0  0  0.00
  179 O  0.0809  0.633  0.9275  0  0  0  0  0  0  0  0  0.00
  180 O  0.5809  0.867  0.5725  0  0  0  0  0  0  0  0  0.00
  181 O  0.1177  0.837  0.7406  0  0  0  0  0  0  0  0  0.00
  182 O  0.6177  0.663  0.7594  0  0  0  0  0  0  0  0  0.00
  183 O  0.8823  0.337  0.2594  0  0  0  0  0  0  0  0  0.00
  184 O  0.3823  0.163  0.2406  0  0  0  0  0  0  0  0  0.00
  185 O  0.8823  0.163  0.2594  0  0  0  0  0  0  0  0  0.00
  186 O  0.3823  0.337  0.2406  0  0  0  0  0  0  0  0  0.00
  187 O  0.1177  0.663  0.7406  0  0  0  0  0  0  0  0  0.00
  188 O  0.6177  0.837  0.7594  0  0  0  0  0  0  0  0  0.00
  189 O  0.2116  0.75  0.6913  0  0  0  0  0  0  0  0  0.00
  190 O  0.7116  0.75  0.8087  0  0  0  0  0  0  0  0  0.00
  191 O  0.7884  0.25  0.3087  0  0  0  0  0  0  0  0  0.00
  192 O  0.2884  0.25  0.1913  0  0  0  0  0  0  0  0  0.00
  193 Si  0.4214  0.0711  0.6898  0  0  0  0  0  0  0  0  0.00
  194 Si  0.9214  0.4289  0.8102  0  0  0  0  0  0  0  0  0.00
  195 Si  0.5786  0.5711  0.3102  0  0  0  0  0  0  0  0  0.00
  196 Si  0.0786  0.9289  0.1898  0  0  0  0  0  0  0  0  0.00
  197 Si  0.5786  0.9289  0.3102  0  0  0  0  0  0  0  0  0.00
  198 Si  0.0786  0.5711  0.1898  0  0  0  0  0  0  0  0  0.00
  199 Si  0.4214  0.4289  0.6898  0  0  0  0  0  0  0  0  0.00
  200 Si  0.9214  0.0711  0.8102  0  0  0  0  0  0  0  0  0.00
  201 Si  0.3259  0.0336  0.85  0  0  0  0  0  0  0  0  0.00
  202 Si  0.8259  0.4664  0.65  0  0  0  0  0  0  0  0  0.00
  203 Si  0.6741  0.5336  0.15  0  0  0  0  0  0  0  0  0.00
  204 Si  0.1741  0.9664  0.35  0  0  0  0  0  0  0  0  0.00
  205 Si  0.6741  0.9664  0.15  0  0  0  0  0  0  0  0  0.00
  206 Si  0.1741  0.5336  0.35  0  0  0  0  0  0  0  0  0.00
  207 Si  0.3259  0.4664  0.85  0  0  0  0  0  0  0  0  0.00
  208 Si  0.8259  0.0336  0.65  0  0  0  0  0  0  0  0  0.00
  209 Si  0.2792  0.0536  0.0655  0  0  0  0  0  0  0  0  0.00
  210 Si  0.7792  0.4464  0.4345  0  0  0  0  0  0  0  0  0.00
  211 Si  0.7208  0.5536  0.9345  0  0  0  0  0  0  0  0  0.00
  212 Si  0.2208  0.9464  0.5655  0  0  0  0  0  0  0  0  0.00
  213 Si  0.7208  0.9464  0.9345  0  0  0  0  0  0  0  0  0.00
  214 Si  0.2208  0.5536  0.5655  0  0  0  0  0  0  0  0  0.00
  215 Si  0.2792  0.4464  0.0655  0  0  0  0  0  0  0  0  0.00
  216 Si  0.7792  0.0536  0.4345  0  0  0  0  0  0  0  0  0.00
  217 Si  0.1246  0.0514  0.0481  0  0  0  0  0  0  0  0  0.00
  218 Si  0.6246  0.4486  0.4519  0  0  0  0  0  0  0  0  0.00
  219 Si  0.8754  0.5514  0.9519  0  0  0  0  0  0  0  0  0.00
  220 Si  0.3754  0.9486  0.5481  0  0  0  0  0  0  0  0  0.00
  221 Si  0.8754  0.9486  0.9519  0  0  0  0  0  0  0  0  0.00
  222 Si  0.3754  0.5514  0.5481  0  0  0  0  0  0  0  0  0.00
  223 Si  0.1246  0.4486  0.0481  0  0  0  0  0  0  0  0  0.00
  224 Si  0.6246  0.0514  0.4519  0  0  0  0  0  0  0  0  0.00
  225 Si  0.0721  0.036  0.8233  0  0  0  0  0  0  0  0  0.00
  226 Si  0.5721  0.464  0.6767  0  0  0  0  0  0  0  0  0.00
  227 Si  0.9279  0.536  0.1767  0  0  0  0  0  0  0  0  0.00
  228 Si  0.4279  0.964  0.3233  0  0  0  0  0  0  0  0  0.00
  229 Si  0.9279  0.964  0.1767  0  0  0  0  0  0  0  0  0.00
  230 Si  0.4279  0.536  0.3233  0  0  0  0  0  0  0  0  0.00
  231 Si  0.0721  0.464  0.8233  0  0  0  0  0  0  0  0  0.00
  232 Si  0.5721  0.036  0.6767  0  0  0  0  0  0  0  0  0.00
  233 Si  0.2034  0.0687  0.7197  0  0  0  0  0  0  0  0  0.00
  234 Si  0.7034  0.4313  0.7803  0  0  0  0  0  0  0  0  0.00
  235 Si  0.7966  0.5687  0.2803  0  0  0  0  0  0  0  0  0.00
  236 Si  0.2966  0.9313  0.2197  0  0  0  0  0  0  0  0  0.00
  237 Si  0.7966  0.9313  0.2803  0  0  0  0  0  0  0  0  0.00
  238 Si  0.2966  0.5687  0.2197  0  0  0  0  0  0  0  0  0.00
  239 Si  0.2034  0.4313  0.7197  0  0  0  0  0  0  0  0  0.00
  240 Si  0.7034  0.0687  0.7803  0  0  0  0  0  0  0  0  0.00
  241 Si  0.4195  0.8274  0.6805  0  0  0  0  0  0  0  0  0.00
  242 Si  0.9195  0.6726  0.8195  0  0  0  0  0  0  0  0  0.00
  243 Si  0.5805  0.3274  0.3195  0  0  0  0  0  0  0  0  0.00
  244 Si  0.0805  0.1726  0.1805  0  0  0  0  0  0  0  0  0.00
  245 Si  0.5805  0.1726  0.3195  0  0  0  0  0  0  0  0  0.00
  246 Si  0.0805  0.3274  0.1805  0  0  0  0  0  0  0  0  0.00
  247 Si  0.4195  0.6726  0.6805  0  0  0  0  0  0  0  0  0.00
  248 Si  0.9195  0.8274  0.8195  0  0  0  0  0  0  0  0  0.00
  249 Si  0.3152  0.8765  0.8361  0  0  0  0  0  0  0  0  0.00
  250 Si  0.8152  0.6235  0.6639  0  0  0  0  0  0  0  0  0.00
  251 Si  0.6848  0.3765  0.1639  0  0  0  0  0  0  0  0  0.00
  252 Si  0.1848  0.1235  0.3361  0  0  0  0  0  0  0  0  0.00
  253 Si  0.6848  0.1235  0.1639  0  0  0  0  0  0  0  0  0.00
  254 Si  0.1848  0.3765  0.3361  0  0  0  0  0  0  0  0  0.00
  255 Si  0.3152  0.6235  0.8361  0  0  0  0  0  0  0  0  0.00
  256 Si  0.8152  0.8765  0.6639  0  0  0  0  0  0  0  0  0.00
  257 Si  0.2733  0.8278  0.0402  0  0  0  0  0  0  0  0  0.00
  258 Si  0.7733  0.6722  0.4598  0  0  0  0  0  0  0  0  0.00
  259 Si  0.7267  0.3278  0.9598  0  0  0  0  0  0  0  0  0.00
  260 Si  0.2267  0.1722  0.5402  0  0  0  0  0  0  0  0  0.00
  261 Si  0.7267  0.1722  0.9598  0  0  0  0  0  0  0  0  0.00
  262 Si  0.2267  0.3278  0.5402  0  0  0  0  0  0  0  0  0.00
  263 Si  0.2733  0.6722  0.0402  0  0  0  0  0  0  0  0  0.00
  264 Si  0.7733  0.8278  0.4598  0  0  0  0  0  0  0  0  0.00
  265 Si  0.1185  0.8279  0.0183  0  0  0  0  0  0  0  0  0.00
  266 Si  0.6185  0.6721  0.4817  0  0  0  0  0  0  0  0  0.00
  267 Si  0.8815  0.3279  0.9817  0  0  0  0  0  0  0  0  0.00
  268 Si  0.3815  0.1721  0.5183  0  0  0  0  0  0  0  0  0.00
  269 Si  0.8815  0.1721  0.9817  0  0  0  0  0  0  0  0  0.00
  270 Si  0.3815  0.3279  0.5183  0  0  0  0  0  0  0  0  0.00
  271 Si  0.1185  0.6721  0.0183  0  0  0  0  0  0  0  0  0.00
  272 Si  0.6185  0.8279  0.4817  0  0  0  0  0  0  0  0  0.00
  273 Si  0.0657  0.8794  0.8087  0  0  0  0  0  0  0  0  0.00
  274 Si  0.5657  0.6206  0.6913  0  0  0  0  0  0  0  0  0.00
  275 Si  0.9343  0.3794  0.1913  0  0  0  0  0  0  0  0  0.00
  276 Si  0.4343  0.1206  0.3087  0  0  0  0  0  0  0  0  0.00
  277 Si  0.9343  0.1206  0.1913  0  0  0  0  0  0  0  0  0.00
  278 Si  0.4343  0.3794  0.3087  0  0  0  0  0  0  0  0  0.00
  279 Si  0.0657  0.6206  0.8087  0  0  0  0  0  0  0  0  0.00
  280 Si  0.5657  0.8794  0.6913  0  0  0  0  0  0  0  0  0.00
  281 Si  0.1947  0.8288  0.7092  0  0  0  0  0  0  0  0  0.00
  282 Si  0.6947  0.6712  0.7908  0  0  0  0  0  0  0  0  0.00
  283 Si  0.8053  0.3288  0.2908  0  0  0  0  0  0  0  0  0.00
  284 Si  0.3053  0.1712  0.2092  0  0  0  0  0  0  0  0  0.00
  285 Si  0.8053  0.1712  0.2908  0  0  0  0  0  0  0  0  0.00
  286 Si  0.3053  0.3288  0.2092  0  0  0  0  0  0  0  0  0.00
  287 Si  0.1947  0.6712  0.7092  0  0  0  0  0  0  0  0  0.00
  288 Si  0.6947  0.8288  0.7908  0  0  0  0  0  0  0  0  0.00
