# Supplementary material for: Diffusion in confinement: kinetic simulations of self- and collective diffusion behavior of adsorbed gases
Source: Royal Society of Chemistry journal article supplement (doi:10.1039/c2cp41147d), 2012-01-01
Supplement: c2cp41147d_4.cssr [file c2cp41147d_4.cssr]

                                  14.349  14.349  10.398
                   90.0  90.0  90.0  SPGR =  1 P 1         OPT = 1
96   0
0 SAS       : SAS
  1 O  0.2418  0.0  0.0  0  0  0  0  0  0  0  0  0.00
  2 O  0.0  0.2418  0.0  0  0  0  0  0  0  0  0  0.00
  3 O  0.0  0.7582  0.0  0  0  0  0  0  0  0  0  0.00
  4 O  0.7582  0.0  0.0  0  0  0  0  0  0  0  0  0.00
  5 O  0.7418  0.5  0.5  0  0  0  0  0  0  0  0  0.00
  6 O  0.5  0.7418  0.5  0  0  0  0  0  0  0  0  0.00
  7 O  0.5  0.2582  0.5  0  0  0  0  0  0  0  0  0.00
  8 O  0.2582  0.5  0.5  0  0  0  0  0  0  0  0  0.00
  9 O  0.169  0.169  0.0  0  0  0  0  0  0  0  0  0.00
  10 O  0.831  0.169  0.0  0  0  0  0  0  0  0  0  0.00
  11 O  0.169  0.831  0.0  0  0  0  0  0  0  0  0  0.00
  12 O  0.831  0.831  0.0  0  0  0  0  0  0  0  0  0.00
  13 O  0.669  0.669  0.5  0  0  0  0  0  0  0  0  0.00
  14 O  0.331  0.669  0.5  0  0  0  0  0  0  0  0  0.00
  15 O  0.669  0.331  0.5  0  0  0  0  0  0  0  0  0.00
  16 O  0.331  0.331  0.5  0  0  0  0  0  0  0  0  0.00
  17 O  0.5  0.8745  0.7865  0  0  0  0  0  0  0  0  0.00
  18 O  0.1255  0.5  0.7865  0  0  0  0  0  0  0  0  0.00
  19 O  0.8745  0.5  0.7865  0  0  0  0  0  0  0  0  0.00
  20 O  0.5  0.1255  0.2135  0  0  0  0  0  0  0  0  0.00
  21 O  0.5  0.8745  0.2135  0  0  0  0  0  0  0  0  0.00
  22 O  0.5  0.1255  0.7865  0  0  0  0  0  0  0  0  0.00
  23 O  0.8745  0.5  0.2135  0  0  0  0  0  0  0  0  0.00
  24 O  0.1255  0.5  0.2135  0  0  0  0  0  0  0  0  0.00
  25 O  0.0  0.3745  0.2865  0  0  0  0  0  0  0  0  0.00
  26 O  0.6255  0.0  0.2865  0  0  0  0  0  0  0  0  0.00
  27 O  0.3745  0.0  0.2865  0  0  0  0  0  0  0  0  0.00
  28 O  0.0  0.6255  0.7135  0  0  0  0  0  0  0  0  0.00
  29 O  0.0  0.3745  0.7135  0  0  0  0  0  0  0  0  0.00
  30 O  0.0  0.6255  0.2865  0  0  0  0  0  0  0  0  0.00
  31 O  0.3745  0.0  0.7135  0  0  0  0  0  0  0  0  0.00
  32 O  0.6255  0.0  0.7135  0  0  0  0  0  0  0  0  0.00
  33 O  0.3261  0.8629  0.8723  0  0  0  0  0  0  0  0  0.00
  34 O  0.1371  0.3261  0.8723  0  0  0  0  0  0  0  0  0.00
  35 O  0.8629  0.6739  0.8723  0  0  0  0  0  0  0  0  0.00
  36 O  0.3261  0.1371  0.1277  0  0  0  0  0  0  0  0  0.00
  37 O  0.6739  0.8629  0.1277  0  0  0  0  0  0  0  0  0.00
  38 O  0.6739  0.1371  0.8723  0  0  0  0  0  0  0  0  0.00
  39 O  0.8629  0.3261  0.1277  0  0  0  0  0  0  0  0  0.00
  40 O  0.1371  0.6739  0.1277  0  0  0  0  0  0  0  0  0.00
  41 O  0.6739  0.1371  0.1277  0  0  0  0  0  0  0  0  0.00
  42 O  0.8629  0.6739  0.1277  0  0  0  0  0  0  0  0  0.00
  43 O  0.1371  0.3261  0.1277  0  0  0  0  0  0  0  0  0.00
  44 O  0.6739  0.8629  0.8723  0  0  0  0  0  0  0  0  0.00
  45 O  0.3261  0.1371  0.8723  0  0  0  0  0  0  0  0  0.00
  46 O  0.3261  0.8629  0.1277  0  0  0  0  0  0  0  0  0.00
  47 O  0.1371  0.6739  0.8723  0  0  0  0  0  0  0  0  0.00
  48 O  0.8629  0.3261  0.8723  0  0  0  0  0  0  0  0  0.00
  49 O  0.8261  0.3629  0.3723  0  0  0  0  0  0  0  0  0.00
  50 O  0.6371  0.8261  0.3723  0  0  0  0  0  0  0  0  0.00
  51 O  0.3629  0.1739  0.3723  0  0  0  0  0  0  0  0  0.00
  52 O  0.8261  0.6371  0.6277  0  0  0  0  0  0  0  0  0.00
  53 O  0.1739  0.3629  0.6277  0  0  0  0  0  0  0  0  0.00
  54 O  0.1739  0.6371  0.3723  0  0  0  0  0  0  0  0  0.00
  55 O  0.3629  0.8261  0.6277  0  0  0  0  0  0  0  0  0.00
  56 O  0.6371  0.1739  0.6277  0  0  0  0  0  0  0  0  0.00
  57 O  0.1739  0.6371  0.6277  0  0  0  0  0  0  0  0  0.00
  58 O  0.3629  0.1739  0.6277  0  0  0  0  0  0  0  0  0.00
  59 O  0.6371  0.8261  0.6277  0  0  0  0  0  0  0  0  0.00
  60 O  0.1739  0.3629  0.3723  0  0  0  0  0  0  0  0  0.00
  61 O  0.8261  0.6371  0.3723  0  0  0  0  0  0  0  0  0.00
  62 O  0.8261  0.3629  0.6277  0  0  0  0  0  0  0  0  0.00
  63 O  0.6371  0.1739  0.3723  0  0  0  0  0  0  0  0  0.00
  64 O  0.3629  0.8261  0.3723  0  0  0  0  0  0  0  0  0.00
  65 Si  0.2662  0.8893  0.0  0  0  0  0  0  0  0  0  0.00
  66 Si  0.1107  0.2662  0.0  0  0  0  0  0  0  0  0  0.00
  67 Si  0.8893  0.7338  0.0  0  0  0  0  0  0  0  0  0.00
  68 Si  0.2662  0.1107  0.0  0  0  0  0  0  0  0  0  0.00
  69 Si  0.7338  0.8893  0.0  0  0  0  0  0  0  0  0  0.00
  70 Si  0.7338  0.1107  0.0  0  0  0  0  0  0  0  0  0.00
  71 Si  0.8893  0.2662  0.0  0  0  0  0  0  0  0  0  0.00
  72 Si  0.1107  0.7338  0.0  0  0  0  0  0  0  0  0  0.00
  73 Si  0.7662  0.3893  0.5  0  0  0  0  0  0  0  0  0.00
  74 Si  0.6107  0.7662  0.5  0  0  0  0  0  0  0  0  0.00
  75 Si  0.3893  0.2338  0.5  0  0  0  0  0  0  0  0  0.00
  76 Si  0.7662  0.6107  0.5  0  0  0  0  0  0  0  0  0.00
  77 Si  0.2338  0.3893  0.5  0  0  0  0  0  0  0  0  0.00
  78 Si  0.2338  0.6107  0.5  0  0  0  0  0  0  0  0  0.00
  79 Si  0.3893  0.7662  0.5  0  0  0  0  0  0  0  0  0.00
  80 Si  0.6107  0.2338  0.5  0  0  0  0  0  0  0  0  0.00
  81 Si  0.609  0.891  0.75  0  0  0  0  0  0  0  0  0.00
  82 Si  0.109  0.609  0.75  0  0  0  0  0  0  0  0  0.00
  83 Si  0.891  0.391  0.75  0  0  0  0  0  0  0  0  0.00
  84 Si  0.609  0.109  0.25  0  0  0  0  0  0  0  0  0.00
  85 Si  0.391  0.891  0.25  0  0  0  0  0  0  0  0  0.00
  86 Si  0.391  0.109  0.75  0  0  0  0  0  0  0  0  0.00
  87 Si  0.891  0.609  0.25  0  0  0  0  0  0  0  0  0.00
  88 Si  0.109  0.391  0.25  0  0  0  0  0  0  0  0  0.00
  89 Si  0.391  0.109  0.25  0  0  0  0  0  0  0  0  0.00
  90 Si  0.891  0.391  0.25  0  0  0  0  0  0  0  0  0.00
  91 Si  0.109  0.609  0.25  0  0  0  0  0  0  0  0  0.00
  92 Si  0.391  0.891  0.75  0  0  0  0  0  0  0  0  0.00
  93 Si  0.609  0.109  0.75  0  0  0  0  0  0  0  0  0.00
  94 Si  0.609  0.891  0.25  0  0  0  0  0  0  0  0  0.00
  95 Si  0.109  0.391  0.75  0  0  0  0  0  0  0  0  0.00
  96 Si  0.891  0.609  0.75  0  0  0  0  0  0  0  0  0.00
